1 **Unbiased estimation of the population-level motor module**

2

3 Yusuke Matsui<sup>1,2,\*</sup>, Kohei Uno<sup>1</sup>, Ippei Nojima<sup>3</sup>

4

5 <sup>1</sup>Biomedical and Health Informatics Unit, Department of Integrated Health Science, Nagoya

6 University Graduate School of Medicine, 461-8673 Nagoya, Aichi, Japan

7 <sup>2</sup>Institute for Glyco-core Research (iGCORE), Nagoya University, 461-8673 Nagoya, Aichi,

8 Japan

9 <sup>3</sup>Graduate School of Medical Sciences, Department of Physical Therapy, Nagoya City

10 University

11

12 \*Corresponding author:

13 Yusuke Matsui

14

## 15 **Summary**

16 Motor module is a functional neurophysiological command for muscle coordination. In  
17 clinical settings, population-level characterization and comparison of motor modules are  
18 necessary to evaluate pathophysiological mechanisms and intervention effects. Previous  
19 studies have estimated individual motor modules and then compared them, but the validity of  
20 capturing the distribution of the latent population has not been fully understood. Our study  
21 aimed to address this issue by investigating the accuracy of estimating the population mean of  
22 motor modules. Through simulation experiments, we found that previous individual-based  
23 approach did not converge regardless of sample size and was vulnerable to noise. We  
24 developed an unbiased estimation algorithm using the framework of functional data analysis,  
25 which significantly improved estimation accuracy. Our findings highlight statistical  
26 challenges for motor module analysis and suggest the need for further research on new  
27 computational algorithms using large-scale clinical data.

28 **Keywords:** Motor module, computational approach, muscle activity, functional data analysis,  
29 estimation, model

30 Graphical Abstract

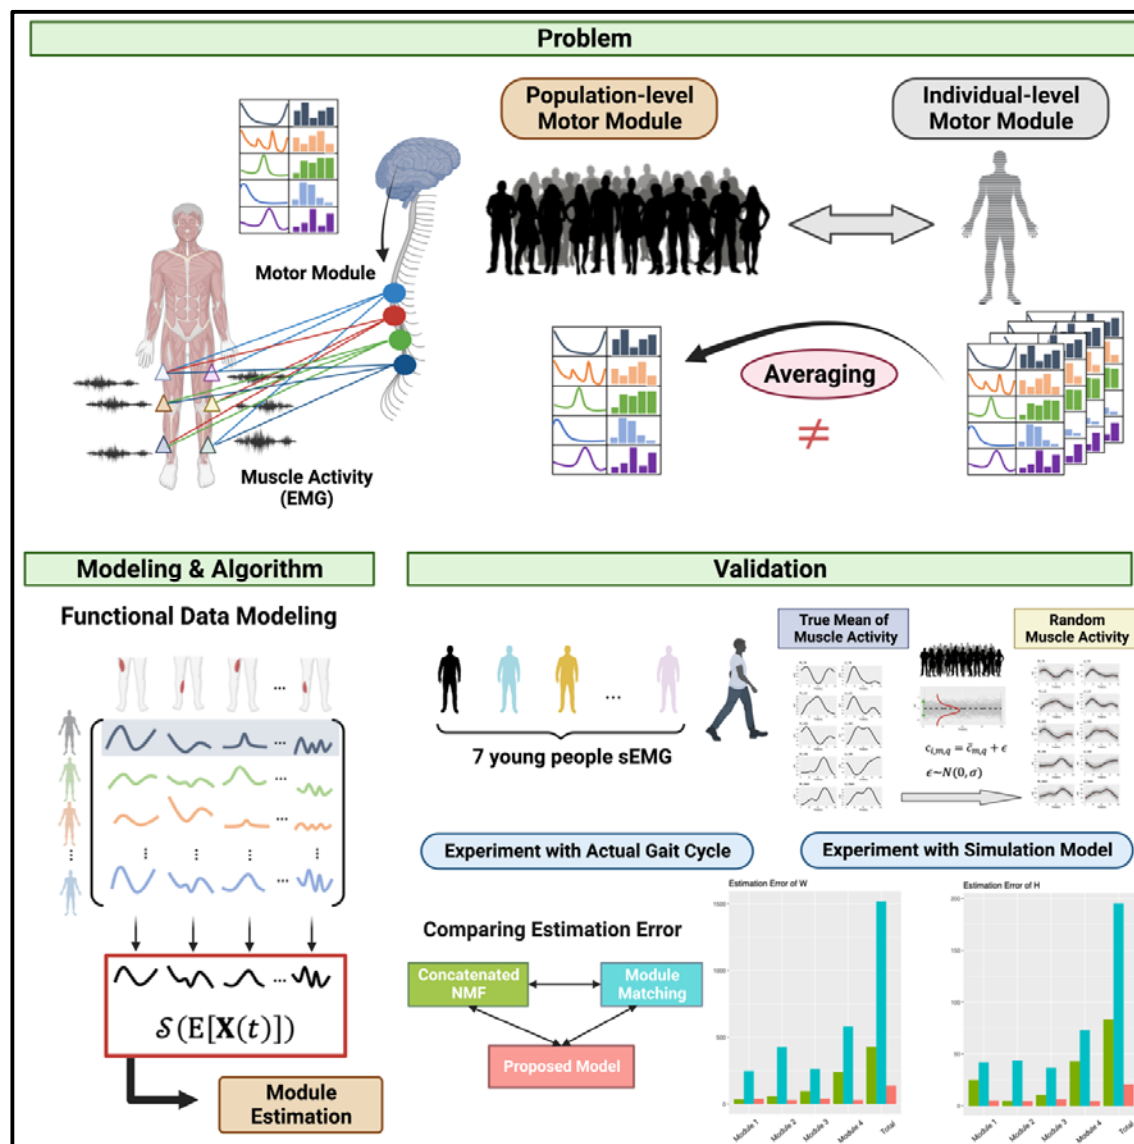

31

32

### 33 **Introduction**

34           Motor control is a complex process that involves coordinated commands for  
35 thousands of motor units in hundreds of skeletal muscles, generated by the central nervous  
36 system in real-time to produce movements. To help explain this complexity, the concept of a  
37 motor module or muscle synergy has been proposed<sup>1-6</sup>. A motor module is a set of functional  
38 neurophysiological commands that drive muscle coordination<sup>1,7</sup>. Currently, motor modules are  
39 characterized via dimension-reduction techniques such as non-negative matrix factorization  
40 (NMF)<sup>8-10</sup> (**Figure 1A**). However, NMF only finds two matrices that minimize residual errors  
41 for each dataset, and the resulting values have no biological meaning<sup>11,12</sup>. This makes it  
42 challenging to compare or summarize motor modules across multiple subjects (**Figure 1C**).  
43 Previous computational methodological study has mainly focused on developing  
44 sophisticated models for individual motor modules and improving their estimation  
45 reproducibility<sup>13-15</sup>. However, to gain a better understanding of the generality of motor  
46 modules, it is also crucial to establish their structure at the population level. Unfortunately,  
47 however, statistical and computational methods for this purpose have not yet been fully  
48 elucidated.

49           To address these challenges, two main approaches have been emerged. One approach  
50 involves module matching between subjects<sup>16-20</sup>, where individual motor modules are  
51 estimated and then matched to each other. However, this approach is not always guaranteed

52 to give a one-to-one solution, and the repeated application of NMF individually can  
53 contaminate motor module estimates by local solutions due to initial value dependence.  
54 Another approach is joint learning called concatenated NMF (cNMF), where subjects' data  
55 are combined into one pseudo-data as input<sup>11,21,22</sup>. This approach can help to avoid some of  
56 the problems with module matching, but it can also be numerically unstable and lead to  
57 convergence issues as the matrix size increases with the number of subjects. Overall,  
58 developing reliable statistical and computational methods for characterizing motor modules at  
59 the population level is an ongoing challenge, but it is crucial to advancing our understanding  
60 of motor control and its organization across individuals. To address these issues, this study  
61 presents an unbiased estimation algorithm for motor modules at the population level using  
62 NMF and Functional Data Analysis (FDA)<sup>23,24</sup> (**Figure 1D**). Our approach accounts for  
63 population variability and reduces statistical errors in motor module expectation estimation,  
64 particularly in larger sample sizes where other methods fail to converge.

## 65 **Results**

### 66 **Population-level motor module estimation**

67 In this section, we statistically formulated the population-level motor module  
68 borrowing the concept of FDA<sup>23,24</sup>. We decompose the variability in muscle activity into two  
69 levels: within-individual variability and between-individual variability. Within-individual  
70 variability accounts for variations within a single subject, such as trial-to-trial variation in the

71 gait cycle, which can be reduced through preprocessing steps like filtering and temporal  
72 alignment. In contrast, between-individual variability arises from differences between  
73 subjects. We use the FDA to model this variability, taking into account the population  
74 characteristics. In the discussion that follows, individual muscle activity data shall be  
75 subjected to appropriate preprocessing, such as filtering, outlier removal, temporal alignment,  
76 and summarization, for inter-subject comparison.

77 To describe between-subjects variability in muscle activity, individual muscle  
78 activity patterns are described by functional random variables. Let  $X_m(t)$  be a random  
79 functional variable, where the activity of skeletal muscle  $m$  at time  $t$  is represented by the  
80 function. The muscle activity  $x_{i,m}(t)$  of subject  $i$  that we observe can be viewed as the  
81 observed values sampled from the functional population  $\Omega$ . The observed muscle activity of  
82 individual subject can be denoted with the population mean

$$\mu_m(t) = E[X_m(t)]$$

83 and the error term  $\epsilon_m(t)$  as

$$x_{i,m}(t) = \mu_m(t) + \epsilon_{i,m}(t) \#(1)$$

84 where  $\epsilon_m(t)$  is parameterized by  $E[\epsilon_m(t)] = 0$  and  $\text{Var}[\epsilon_m(t)] = \sigma$ , representing  
85 population-level variability. The typical distribution that  $X_m(t)$  follows is the normal  
86 distribution, but if non-negative constraints are considered, a non-negative exponential family  
87 of distribution (such as the Poisson distribution) can also be assumed<sup>25</sup>. In practice, to deal

88 with digitized discrete data, time  $t$  is discretized as a vector  $t$  with length  $T$ :

$$x_{i,t,m} = \mu_{t,m} + \epsilon_{i,t,m} \#(2)$$

89 Our proposed population-level motor module can be estimated using  $\mu_{t,m}$ . The

90 population mean of muscle activity, expressed in matrix form with  $\mu_{t,m}$  as an element, is

$$\mathbf{U} = \begin{bmatrix} \mu_{1,1} & \mu_{1,2} & \cdots & \mu_{1,M} \\ \mu_{2,1} & \mu_{2,2} & \cdots & \mu_{2,M} \\ \vdots & \vdots & \cdots & \vdots \\ \mu_{T,1} & \mu_{T,2} & \cdots & \mu_{T,M} \end{bmatrix} \#(3)$$

91 and motor module can be estimated by dimension reduction algorithm. In case of NMF, the

92 mean muscle activity matrix  $\mathbf{U}$  can be decomposed as

$$\mathbf{U} = \mathbf{WH} + \mathbf{E} \#(4)$$

93 where  $\mathbf{E}$  is the estimation error term matrix. The resulting matrix  $\mathbf{W}$  and  $\mathbf{H}$  are population

94 version of primitive signals and synergy, respectively.

### 95 Existing approaches

96 Next, here we compare the proposed method with two existing approaches to

97 population mean estimation of motor modules: the module matching approach and cNMF

98 approach. The major difference between the proposed method and the two existing

99 approaches is that the population mean is estimated after first estimating each individual

100 motor module. Denote by  $\mathbf{X}$  the matrix whose elements are  $x_{i,t,m}$ :

$$\mathbf{X}_i = \begin{bmatrix} x_{i,1,1} & x_{i,1,2} & \cdots & x_{i,1,M} \\ x_{i,2,1} & x_{i,2,2} & \cdots & x_{i,2,M} \\ \vdots & \vdots & \cdots & \vdots \\ x_{i,T,1} & x_{i,T,2} & \cdots & x_{i,T,M} \end{bmatrix} \#(5)$$

101 For the module matching approach, individual motor modules are first estimated:

$$\mathbf{X}_i = \mathbf{W}_i \mathbf{H}_i + \mathbf{E} \#(6)$$

102 In contrast to the proposed method, the order of the synthesized variables (i.e., rows of  $\mathbf{W}$   
103 and columns of  $\mathbf{H}$ ) is arbitrary, so matching process is critical to make the modules  
104 correspond across subjects. One way to find the module of subject  $j$  that corresponds to the  
105 synergy  $k$  of subject  $i$  is to find a module of subject  $j$  that maximizes the correlation  
106 coefficient. That is,

$$k' = \operatorname{argmax}_l \operatorname{cor}(\mathbf{w}_{ik}, \mathbf{w}_{jl}) \#(7)$$

107 where  $\mathbf{w}_{ik}$  and  $\mathbf{w}_{jl}$  are column vector of matrix  $\mathbf{W}_i$  and  $\mathbf{W}_j$ , respectively. To estimate the  
108 population mean of the motor module estimation, the mean of the matrix  $\mathbf{W}$  or  $\mathbf{H}$  is  
109 calculated for each subject after matching.

110 In this approach, the final  $\mathbf{W}$  and  $\mathbf{H}$  include mismatch errors due to the fact that  
111 the optimal number of modules (i.e., rows of  $\mathbf{W}$  and columns of  $\mathbf{H}$ ) can be different across  
112 the subjects and there is no guarantee of a one-to-one correspondence between modules, and  
113 estimation errors resulting from local solutions due to initial value dependency of NMF  
114 algorithm<sup>26,28</sup>.

115 On the other hand, cNMF also performs individual module estimation, but it  
116 estimates individual motor modules by combining subjects as one pseudo-subject, applying  
117 NMF, and re-splitting the obtained results for each subject. To construct the input matrix, the



118 individual muscle activity matrices  $\mathbf{X}_1, \mathbf{X}_2, \dots, \mathbf{X}_n$  are concatenated row by row

$$\mathbf{X}^c = \begin{bmatrix} \mathbf{X}_1 \\ \mathbf{X}_2 \\ \vdots \\ \mathbf{X}_n \end{bmatrix} \#(8)$$

119 then, estimate the motor module:

$$\mathbf{X}^c = \mathbf{W}^{[c]} \mathbf{H}^{[c]}$$

120 Splitting  $\mathbf{W}^{[c]}$  into the original sample-wise blocks for  $1, 2, \dots, n$  corresponds to  
121 the primitive signal for each subject. Then, the population mean of the motor module  
122 estimation can be estimated by averaging these estimates. The cNMF approach assumes that  
123 the synergy  $\mathbf{H}^{[c]}$  is common across samples<sup>11</sup>, which is implicitly considered equivalent to  
124 estimating the population mean  $\mathbf{H}$  across subjects. Thus, cNMF can be otherwise described  
125 as a method of estimating  $\mathbf{W}^{[c]}$  conditioned on the population mean  $\mathbf{H}$ , which is expected to  
126 give results close to those of the proposed method.

127 The cNMF algorithm naturally results in larger matrices with increasing sample  
128 sizes, the use of NMF on these matrices can present challenges due to the higher number of  
129 parameters that must be estimated. First, the possibility of initial value-dependent local  
130 optimum solutions is further exacerbated. Also, the inclusion of some outliers can affect the  
131 process of sequential optimization, making it less robust to noise and increasing the  
132 likelihood of bias in the estimated results. It also increases the computational cost in terms of  
133 memory size and iteration to convergence.

134 **Evaluation with an actual data set**

135 The proposed method was examined using the muscle activity during the gait cycle in seven  
136 young healthy subjects (**Figure 3A**). Based on the preprocessed muscle activities, the  
137 expected motor modules were estimated using three methods: the proposed method, module  
138 matching approach, and cNMF-based approach (**Figure 3B**). The number of motor modules  
139 was determined by the variance accounted for (VAF) (**Star Methods**). We selected 4 as the  
140 number of motor modules based on a  $VAF \geq 99\%$ .

141 Although both methods showed similar trends for both **W** and **H**, inter-method  
142 variability in the estimates was evident (**Figure 3B**). For example, module 4 showed a  
143 marked difference in the timing of the increase in the primitive signal (**Figure 3B**). This  
144 could lead to substantially conflicting conclusions regarding the timing of CNS activity  
145 during gait cycles between the proposed and other methods. There was also significant  
146 variation between the methods in module estimation (**Figure 3B**), with the individual-based  
147 approach indicating that the entire muscle was involved in any module, whereas the  
148 cNMF-based approach and the proposed method suggested a sparse group structure. There  
149 were also significant differences between the cNMF-based approach and the proposed  
150 method, for example, in modules 3 and 4, indicating differences in the inference to the motor  
151 module during gait cycles (**Figure 3B**).

152 **Simulation model for evaluating methods**

153           Next we evaluated the degree to which the expected value of the motor module  
154 could be reproduced for numerically generated population-level muscle activity data (**Figure**  
155 **4A**). Equation (1) allows us to represent individual muscle activity patterns as samples from a  
156 probability distribution with a population mean function and variance. To obtain sample-wise  
157 muscle activity that follows a given probability distributions, we first decompose population  
158 expectation of muscle activity into several linear combinations based on basis functions (e.g.,  
159 B-splines functions). The mean function  $\mu_m(t)$  can be decomposed as

$$\mu_m(t) = \sum_{q=1}^Q \bar{c}_{m,q} b_{m,q}(t) \quad \#(9)$$

160 A set of mutually orthogonal functions  $b_{m,q}(t)$  are used to decompose the population mean  
161 function  $\mu_m(t)$  into  $Q$  functional linear combinations, each of which has weight  
162 coefficients  $\bar{c}_{m,q}$ . Here the coefficient vector  $\bar{\mathbf{c}}_m = (\bar{c}_{m,1}, \bar{c}_{m,2}, \dots, \bar{c}_{m,Q})$  has sufficient  
163 information to reconstruct the population mean function under the basis function. In the FDA  
164 framework, the variation of muscle activity among subjects in a population can be described  
165 by variation with respect to this coefficient vector. In the numerical experiments, a normal  
166 distribution with mean average  $\bar{c}_{m,q}$  and variance  $\sigma$  was assumed for individual muscle  
167 activity.

$$c_{i,m,q} = \bar{c}_{m,q} + \epsilon \quad \#(10)$$

$$\epsilon \sim N(0, \sigma)$$

168 Substituting the sampled coefficient vectors back into equation (9) yields the individual  
169 muscle activities that follow the population distribution.

$$x_{i,m}(t) = \sum_{q=1}^Q c_{i,m,q} b_{m,q}(t) \#(11)$$

170 The FDA-based simulation model can be used to evaluate whether the expected  
171 values estimated from individual motor module estimates reproduce the expected values of  
172 the motor modules derived from the population mean of muscle activity. The residual sum of  
173 squares (RSS) of the true motor module was evaluated to assess the performance of each  
174 method. In other words, for the RSS of  $k$ -th module, we evaluated the

$$\text{RSS}_k^{[W]} = \sum_{t=1}^T \left( w_{tk}^{[true]} - w_{tk}^{[estimated]} \right)^2 \#(12)$$

$$\text{RSS}_k^{[H]} = \sum_{m=1}^M \left( h_{km}^{[true]} - h_{km}^{[estimated]} \right)^2 \#(13)$$

175 where  $w_{tk}^{[estimated]}$  and  $h_{km}^{[estimated]}$  are estimated values for  $\mathbf{W}^{[true]}$  and  $\mathbf{H}^{[true]}$ ,  
176 respectively.

### 177 **The proposed model allows for control of estimation bias**

178 We used a simulation model to assess each method (**Figure 4A**) with generated muscle  
179 activity for  $n=10, 50,$  and  $100$  (**Figure 4B**). While all methods captured the primitive signal's  
180 trend, there was a bias in estimated motor modules based on individual and cNMF compared  
181 to the true motor module (**Figure 4C**). The individual approaches showed a tendency to  
182 overestimate the module weights i.e., averaged  $\mathbf{H}_i$  in equation (6) over subjects after

183 matching (**Figure 4C**). Our proposed method had accuracy close to that of cNMF, but with  
184 less estimation bias (**Figure 4D**). The fourth module showed an overestimation of the weight  
185 of the right leg TA (n=50) and underestimation of the left leg LG with cNMF (n=100)  
186 compared to the proposed method, with differences in the timing of peak signals (**Figure 4C**,  
187 **4D**). We assessed the estimation bias of each method by calculating the RSS residuals for  
188 incremental changes in sample size. Our results showed that the proposed method converges  
189 to an estimation bias of zero as the sample size increases, in contrast to the other methods  
190 (**Figure 5B**). This suggests that existing methods lack asymptotic properties when estimating  
191 the population mean of motor modules.

## 192 **Evaluating noise robustness**

193 To assess the impact of deviating values on estimation accuracy, we conducted a similar  
194 evaluation as in the previous section with 10% of the samples containing deviating signal  
195 values (**Figure 6A, 6B**). For small samples (n=10), all methods showed large estimation  
196 errors (**Figure 6C, 6D**). However, as the sample size increased (n=50, n=100), the proposed  
197 method significantly reduced the error compared to the other methods (**Figure 7A**). When we  
198 also examined the convergence of the estimation error with increasing sample size, the  
199 estimation bias of the proposed method converged to zero, while the other methods showed  
200 no tendency to converge (**Figure 7B**). Specifically, the estimation bias of cNMF increased

201 significantly compared to the case without deviating values (**Figures 5A, 5B; Figures 7A,**  
202 **7B**), indicating its sensitivity to such values.

### 203 **Discussion**

204 We proposed an algorithm for estimating the motor module at the population level  
205 using Non-Negative Matrix Factorization (NMF) within the framework of Functional Data  
206 Analysis (FDA). Our method first estimates the population mean of muscle activity and then  
207 performs motor module estimation based on it. In contrast, the existing approach estimates  
208 the population mean after estimating the motor module for individual. The difference  
209 between the two approaches may seem simple, but our approach has been shown to  
210 significantly reduce estimation bias beyond a certain sample size and is also robust to noise.

211 Although our proposed algorithm showed convergence to the true motor module  
212 patterns with only 25 to 30 samples, the existing approaches failed as the sample size  
213 increased (**Figure 5B**). This was true even in the presence of samples that contained some  
214 deviant signal values (**Figure 6B**). Various factors can contribute to the failure of existing  
215 methods to converge. For example, the module-matching method can cause forced matching  
216 errors when there is no corresponding module, while cNMF may suffer from numerical  
217 instability or bias contamination due to collinearity or deviation values as the number of  
218 parameters to be optimized increases with the number of samples.

219           Our results indicate that our proposed algorithm outperforms existing methods in  
220 terms of noise robustness and convergence to true motor module estimates. However, we also  
221 found that the presented algorithm had a rather large estimation bias in small-sample  
222 conditions, and full convergence required larger samples (**Figure 6B-D, Figure 7A, 7B**).  
223 Therefore, while our proposed algorithm is an improvement over existing methods, its  
224 application may be limited in situations where the variability of the population is high and the  
225 sample size is very small. These results highlighted the need for statistical improvements in  
226 computational algorithms.

227           Alternative methods, such as principal component analysis (PCA)<sup>27,29,30</sup> and factor  
228 analysis (FA)<sup>31,32</sup>, can also be utilized for motor module estimation, but in this study, we  
229 focused on NMF. One of the reasons for this choice is that NMF has been frequently  
230 employed and shown promise in estimation accuracy for various tasks, such as walking and  
231 running<sup>13</sup>. However, all these methods share common issues related to dimensionality  
232 reduction, such as the matching of synthetic variables' order and sign, and potential  
233 contamination from heterogeneous observations, such as outliers<sup>33,34</sup>. Therefore, it is essential  
234 to further investigate and improve upon the accuracy and estimation methods for  
235 population-level motor module parameter estimation based on dimensionality reduction in the  
236 future direction.

237           This study has several limitations. Firstly, the validity of the estimation algorithm  
238 needs to be comprehensively evaluated for other commonly used movement tasks besides  
239 periodic walking. Secondly, the actual data analysis was performed using a small number of  
240 samples, and further evaluation with a larger clinical dataset is necessary. Thirdly, the  
241 presented algorithm assumes a homogeneous distribution of the latent population, and when  
242 multiple heterogeneous subpopulations are mixed, subpopulations must be identified and  
243 stratified. In this regard, future tasks include identifying subgroups based on dimension  
244 reduction<sup>35</sup> and clustering<sup>36,37</sup> and developing methods to test for heterogeneity based on  
245 functional data representation.

246           Characterizing motor modules at the population level is a crucial step towards  
247 translating experimental findings into clinical applications. For example, evaluation of  
248 intervention effects on motor function before and after intervention<sup>38-49</sup>, and large  
249 cross-sectional clinical studies<sup>38,50,51</sup> need to capture effects as a population. The present  
250 study is the first to investigate the motor module estimation algorithm from a  
251 population-level perspective. Although the study has its limitations, such as the small sample  
252 size, it provides valuable insights into the estimation of motor modules at the population level.  
253 Continued development of the algorithms will fully realize their application to a broader  
254 range of movement tasks and clinical situations.

255



256 **Acknowledgments**

257 We would like to thank Editage (<http://www.editage.jp>) for editing and reviewing this  
258 manuscript for English language.

259 **Author Contributions**

260 The study conceptualization was led by YM. Data analysis and interpretation were carried out  
261 by YM and IN. Algorithm development and evaluation were spearheaded by YM and KU.  
262 Manuscript drafting was a joint effort by YM and IN. All authors extensively reviewed,  
263 revised, and approved the final version of the manuscript for submission.

264 **Declaration of Interests**

265 The authors declare no competing interests.

266

267

268

269

270

271

272

273

274

275 **Figure Legends**

276 **Figure 1. Conceptual view of this study**

277 **A) Description of the general motor module estimation algorithm.** Multichannel

278 Electromyography (EMG) data is given by a time  $\times$  muscle matrix. Motor module analysis

279 is a problem of unsupervised low-dimensional structural learning based on muscle activity

280 data from multiple sites. Non-negative matrix factorization (NMF) is widely used as one of

281 them. Each estimated dimension is considered to reflect the activity of the central nervous

282 system, where  $\mathbf{W}$  is called the primitive signal and is considered to be the input signal of the

283 central nervous system, and  $\mathbf{H}$  is called synergy and is considered to represent a potentially

284 cooperating muscle group, or motor module. **B) Population-level motor module and**

285 **individual-level module.** When conducting a multi-subject motor module analysis, there are

286 two approaches depending on the purpose. The first is population-level motor module

287 analysis, which is intended for characterization and inference at the population level and for

288 comparison among populations. The second is individual-level motor module analysis, the

289 main objectives of which are individual-level characterization and inter-individual

290 comparisons. Our goal is to estimate population-level motor module expectations in an

291 unbiased manner. We show that conventional methods are not consistent with true

292 expectations where they estimate the expectation by aggregating individual-level motor

293 modules. **C) Problems with conventional methods.** The main causes are 1) the arbitrariness

294 of the solution due to the unsupervised learning of NMF, 2) local minima problem with an  
295 initial value, 3) errors associated with integrating the results of motor module analysis from  
296 different subjects, and 4) instability of the numerical solution of the NMF algorithm. **D)**  
297 **Proposed method.** We introduce the framework of functional data analysis. Assuming a  
298 stochastic population of muscle activity, the unbiased motor module expectation is estimated  
299 based on the expectation of muscle activity.

300

## 301 **Figure 2. Comparison of algorithms between existing and proposed methods**

302 **A) Module matching approach.** Multichannel Electromyography (EMG) data given in a  
303 time  $\times$  muscle matrix for each individual was used to estimate the motor module using NMF,  
304 and then they are matched and averaged across subjects. **B) Concatenated NMF-based**  
305 **approach.** The NMF is applied by concatenating the EMG matrices across subjects in the  
306 row direction. Since the columns of the muscle activity matrix are fixed, the estimated  
307 synergy  $\mathbf{H}$  approximates the average across subjects, and the primitive signal  $\mathbf{W}$  conditioned  
308 by the common synergy  $\mathbf{H}$  is estimated for each subject. **C) Proposed method.** First,  
309 expectations of muscle activity are estimated from the EMG matrices of multiple subjects,  
310 and NMF is applied to the obtained expected values of muscle activity. Since the expected  
311 values of EMG reflect the population structure, the obtained motor modules also reflect the  
312 population structure.

313

314 **Figure 3. Actual data example**

315 **A) Data overview and analysis design.** The Multichannel Electromyography (EMG) signals

316 of 10 left and right muscles and foot pressure were measured in seven healthy young adults.

317 The data were processed using an in-house analysis pipeline that implements standard muscle

318 activity preprocessing. These preprocessed data were used to compare results from existing

319 and proposed methods. **B) Comparison of estimated motor modules.** Four modules were

320 identified based on variance accounted for. The left panel represents module composition **H**,

321 the columns represent each method, and each row represents motor modules 1 through 4.

322 Although all modules represent close trends between methods, there is variation in the

323 estimates and different interpretations of the muscle groups that constitute the motor module.

324 The right panel represents the primitive signal **W** corresponding to the four synergies, which

325 also shows a similar trend between methods, but some of the modules show different timing

326 of activation, suggesting that the clinical interpretation, such as the correspondence with the

327 gait phase, can be different.

328

329

330 **Figure 4. Simulation experiments of estimation bias**

331 **A) Simulation model.** The model was constructed to generate Multichannel  
332 Electromyography (EMG) based on functional data representation. True muscle activity  $\mu_m$   
333 in skeletal muscle  $m$  was approximated by linear combination by a small set of B-spline  
334 orthogonal basis functions  $b_{m,q}$  by regression splines with coefficients  $\bar{c}_{m,q}$ . To mimic the  
335 simulation of real data, the mean muscle activity derived from the actual muscle activity of  
336 seven subjects was used. Assuming a normal distribution for the probabilistic distribution in  
337 the population, spline regression coefficients corresponding to individual subjects  $c_{i,m,q}$   
338 were generated by adding noise which follows a multivariate normal distribution to  $\bar{c}_{m,q}$ , and  
339 by multiplying the B-spline basis  $b_{m,q}$  which was used for the true muscle activity  
340 approximation  $\mu_m$ . Resulting individual muscle activity profiles follow a normal distribution  
341 in the sense of functional data representation. **B) Generated individual muscle activity and  
342 its expectation.** The individual muscle activity profiles generated for  $n=10, 50,$  and  $100$   
343 samples (gray lines) and their expected values (red) and true muscle activity (black) are  
344 shown. **C) Comparison of estimation bias of motor module expectation.** We estimated the  
345 expectation of motor modules and compared the estimation bias with each method. Here, we  
346 defined “true” expectation of motor module (black) as one estimated from true muscle  
347 activity  $\mu_m$ . The proposed method (red) gave an estimate close to the true motor module

348 expectation (black) in both primitive signal and modules. On the other hand, exiting methods

349 exhibited estimation bias in at least one of the modules.

350

351

352 **Figure 5. Comparison of residual sum of squares for estimation biases**

353 **A) Accuracy of each method.** The residual sum of squares (RSS) calculated based on the  
354 results shown in Figure 4 are displayed for each motor module. The rightmost RSS in each  
355 panel shows the sum of the RSS over all modules. In the simulation, the proposed method  
356 (red) has the lowest RSS for all modules. **B) Asymptotics of RSS with sample size.** The RSS  
357 for each module is shown when the sample size is increased by 5 from 5 to 100 samples.  
358 With the nature of statistical error, RSS should asymptotically approach zero as the sample  
359 size increases. Only the proposed method (red) showed asymptotic behavior in the  
360 simulations.

361

362

363 **Figure 6. Simulation experiment of noise robustness**

364 **A) Simulation model.** The simulation model shown in Figure 4 was modified to include  
365 some outliers. The muscle activity was generated by simulation assuming a population with  
366 10% of outlier samples contaminated in addition to the normal sample. The generation of  
367 outlier samples was accomplished by adding errors with excess variance to a subset of the  
368 coefficients of the regression splines. The samples were then multiplied with the B-spline  
369 basis functions to obtain samples with distinct muscle activity profiles. **B) Generated**  
370 **individual muscle activity and its expectation.** The individual muscle activity profiles  
371 generated for n=10, 50, and 100 samples (gray lines) and their expected values (red) and true  
372 muscle activity (black) are shown. **C) Comparison of the estimation robustness of motor**  
373 **module expectation.** We estimated the expectation of the motor module and compared the  
374 robustness of estimation between methods. Under small-sample conditions, all methods  
375 showed estimation errors, but as the number of samples increased, the proposed method (red)  
376 gave estimates closer to the true motor module expectation.  
377



378

379 **Figure 7. Comparison of the residual sum of squares for robustness**

380 **A) Robustness of each method.** The residual sum of squares (RSS) calculated based on the  
381 results shown in Figure 5 are displayed for each motor module. The rightmost RSS in each  
382 panel shows the sum of RSS over all modules. In the simulation, the proposed method (red)  
383 has the lowest RSS for all synergies, which indicates robustness to outliers. **B) Stability of**  
384 **RSS with sample size.** The RSS for each module is shown when the sample size is increased  
385 by 10 from 10 to 100 samples. It is expected that the effect of outliers will decrease as the  
386 sample size increases. However, only the proposed method (red) showed stability along with  
387 the sample size in this simulation.

388

389

390 **STAR★Methods**

391 **Resource availability**

392 Lead contact

393 matsui@met.nagoya-u.ac.jp

394 Materials availability

395 Data and code availability

396 The analysis code used in the paper can be accessed from the following repository URL

397 (<https://github.com/ymatts/RoMMS>). The acquired data from this study are available from

398 the lead contact upon reasonable request.

399 **Method details**

400 Data acquisition

401 Wireless electromyograms (EMGs) (Trigno EMG sensors, DELSYS, Boston, MA, United

402 States) were recorded from the bilateral tibial anterior (TA), soleus (SOL), medial

403 gastrocnemius (MG), lateral gastrocnemius (LG), rectus femoris (RF), vastus medialis (VM),

404 medial hamstring (MH), and lateral hamstring (LH) muscles, according to SENIAM

405 recommendations. The skin was gently abraded and cleaned with alcohol before the EMG

406 recording. The sensors were placed as far as possible each other anatomically to minimize the

407 potential risk of crosstalk between the EMG recordings. Data were collected for two minutes

408 at a self-selected speed and used to examine steady-state gait by removing the first 10 s of the

409 gait. All the participants walked independently without walkers or crutches. The EMG signals  
410 were amplified (with a 909 gain preamplifier), band-pass filtered (10–450 Hz), and sampled  
411 at 1,000 Hz. Footswitches were attached to the heels to determine the time of foot contact.

## 412 **Preprocessing**

413 The foot pressure signal values acquired from the foot sensors were used to identify the gait  
414 cycle. The time point at which the signal value increased from zero was defined as the heel  
415 contact. sEMG signals were processed for each muscle. They were first low-pass filtered at  
416 30 Hz using a fourth-order Butterworth filter and then rectified. Maximum voluntary  
417 contraction (MVC) normalization was performed at the maximum observation as 100%. An  
418 epoch was created for each gait cycle and identified using a foot sensor. To identify and  
419 exclude abnormal cycles, each trial was projected onto a two-dimensional space using a  
420 robust principal component analysis<sup>52–54</sup>. Using these coordinate values, trials that deviated  
421 significantly from the projected space were defined as outliers and were excluded. The  
422 threshold settings for the anomaly values followed the default values in the R package  
423 `rospca`<sup>55</sup>. The variation in time between the gait cycles was corrected according to linear  
424 length normalization (LLN), with 0% for the first heel contact and 100% for the next heel  
425 contact. Finally, a 10-Hz envelope was derived, and the average was calculated to obtain the  
426 muscle activity.

427 Computational algorithm

428 Because the parameter of time  $t$  is observed as a discrete value in the real world, the muscle  
429 activity  $x_{i,m}(t)$  is expressed as  $x_{i,t,m}$  using the discretized time  $t = 1, 2, \dots, T$ . Equation  
430 (3) can be obtained using the time-discretized version of (4).

$$\bar{m} = \mathcal{S}(\mu_t) + \delta_s \#(8)$$

431 where  $\mu_t = (\mu_{t,1}, \mu_{t,2}, \dots, \mu_{t,M})$  and

$$\mu_{t,m} = \frac{1}{n} \sum_{i=1}^n x_{i,t,m} \#(9)$$

432 The explicit form of the motor module by NMF in equation (6) can be defined using  
433 muscle activity matrix  $\mathbf{U}^{[T \times M]} = \{\mu_{t,m}; t = 1, 2, \dots, T, m = 1, 2, \dots, M\}$ . The primitive signals  
434  $\mathbf{W}^{[T \times K]}$  and synergy  $\mathbf{H}^{[K \times M]}$  obtained by the NMF are derived as follows:

$$\mathbf{U} = \mathbf{WH} + \mathbf{E} \#(10)$$

435 where  $\mathbf{E}$  is the estimation error term with the  $T \times M$  matrix.

436 Analysis pipeline

437 The workflow of the analysis is shown in **Figure 3A**. The first step was to perform standard  
438 signal processing on the raw sEMG signal for each subject, including bandpass filtering,  
439 rectification, MVC normalization, envelope smoothing, and epoching. Then, time alignment  
440 was performed, if necessary. Finally, the trial average was calculated for each muscle to  
441 characterize the muscle activity pattern for one trial per subject. We then estimated the  
442 expected mean of the muscle activity in the subject population according to equation (9) and  
443 applied the NMF to obtain an estimate of the population mean of the motor module shown in

444 equation (10). For the number of modules, we used variance accounted for (VAF), defined

445 below:

$$VAF_{K'} = 1 - \frac{RSS_{K'}}{\sum_{t=1}^T \sum_{m=1}^M x_{t,m}^2} \quad \#(11)$$
$$RSS_{K'} = \sum_{t=1}^T \sum_{m=1}^M (\hat{x}_{t,m} - x_{t,m})^2$$

446 where  $\hat{x}_{t,m}$  is reconstructed matrix of muscle activities using  $K'$  synergy.

447 Simulation model

448 This section presents a simulation model for comparing the performance of each method.

449 Two simulations are conducted. The first is the accuracy with which each approach can

450 reproduce the “true” motor modules in the population (**Figure 3A**). Here, “true” refers to the

451 motor modules “estimated from the true population mean of muscle activity.” Individual

452 muscle activities were generated by adding normally distributed variations with a zero mean

453 and a certain standard deviation to the predefined true population mean.

454 The second is the robustness of motor module estimation in the presence of outliers

455 (**Figure 7A**). Assuming muscle activity from unrelated populations, the muscle activity

456 distributed around different population means was prepared, and the muscle activity

457 distributed around it was generated as an outlier sample. By mixing this with samples from

458 the population of interest, we generated muscle activity that contained outliers and performed

459 a simulation similar to the first to evaluate the reproducibility of the true motor modules.

460 The muscle activity patterns of each subject, which varied based on the population  
461 mean, were generated using the FDA framework (**Figure 3A**). Let the muscle activity in  
462 skeletal muscle  $m$  of subject  $i$  be the function value  $x_{i,m}(t)$ , and let the population mean  
463 be  $\mu_m(t)$  and the population variance be  $\sigma_m(t) = \int_{i=1}^n (x_{i,m}(t) - \mu_m(t))^2$ . Functional  
464 observations can be expressed using several orthogonal basis functions:  $b_{m,q}(t); q =$   
465  $1, 2, \dots, Q$ .

$$\mu_m(t) = \sum_{q=1}^Q \bar{c}_{m,q} b_{m,q}(t) \#(12)$$

466 This simulation used a B-spline basis, which is a typical orthogonal basis function in  
467 the FDA. The coefficients  $\bar{c}_{m,q}$  were estimated based on a regression spline and the number  
468 of basis functions were determined by cross-validation. To mimic the actual muscle activity  
469 pattern, we derive the mean function  $\mu_m(t)$ , which we would like to estimate, from a real  
470 dataset. The average of the preprocessed muscle activity of the seven young healthy subjects  
471 was calculated, and this was set as  $\mu_m(t)$ .

472 For the coefficient vector  $\bar{\mathbf{c}}_m = (\bar{c}_{m,1}, \bar{c}_{m,2}, \dots, \bar{c}_{m,Q})$ , a subject-specific coefficient  
473 vector  $\mathbf{c}_{i,m} = (c_{i,m,1}, c_{i,m,2}, \dots, c_{i,m,Q})$  was generated by adding an independently generated  
474 noise normal distribution, which is considered biological variability (**Figure 4A**). That is, for  
475  $q = 1, 2, \dots, Q$ ,

$$c_{i,m,q} = \bar{c}_{m,q} + \epsilon \#(13)$$

$$\epsilon \sim N(0, \sigma)$$

476 In this simulation, we set  $\sigma = 1$  assuming that the subject population follows a standard  
 477 normal distribution. Finally, the orthogonal basis functions were multiplied again to generate  
 478 the functional observations for each subject.

$$x_{i,m}(t) = \sum_{q=1}^Q c_{i,m,q} b_{m,q}(t) \#(14)$$

479 We compared the algorithms for estimating the population mean of the motor modules using  
 480 muscle activity  $\mathbf{X}_i = \{x_{t,m}\}$  consisting of  $x_{i,t,m}$  discretized by  $t$  in equation (14).

481 For another simulation of the effects of outliers, heterogeneous samples were mixed  
 482 (**Figure 6A**). The muscle activity patterns of these samples were generated using equation  
 483 (13). That is, assume a different population of no interest with population mean  $\mu'_m(t)$ ;

$$\mu'_m(t) = \sum_{q=1}^Q \bar{c}'_{m,q} b_{m,q}(t) \#(15)$$

484 The coefficients  $\bar{c}'_{m,q}$  were randomly selected from the coefficients  $\bar{c}_{m,q}$  of the population  
 485 mean of interest in equation (9), to which was added a noise of normal distribution with large  
 486 standard deviation  $\sigma' (> \sigma)$  (**Figure 6A**);

$$\bar{c}'_{m,q} = \bar{c}_{m,q} + \epsilon' \#(16)$$

$$\epsilon' \sim N(0, \sigma')$$

487 In this simulation on the effect of outlier, two coefficients  $r_1, r_2 (\leq Q)$  were randomly  
 488 selected from  $q = 1, 2, \dots, Q$  and equation (13) was applied and obtained outlier samples;

$$x_{i',m}(t) = \sum_{q=1}^Q c'_{i',m,q} b_{m,q}(t) \#(17)$$

489 The percentage of outlier samples was simulated as 10% of the total sample size,  $N$ .

490 Evaluation of methods

491 In this section, we evaluate the performance of these methods using a simulation dataset. We

492 defined the motor module derived on the basis of equation (12) as the “true” motor module.

493 Let  $\mathbf{W}^{[true]}$  and  $\mathbf{H}^{[true]}$  denote the true motor module estimates obtained by using the

494 NMF algorithm. Each matrix element is denoted as  $w_{tk}^{true} \in \mathbf{W}^{[true]}$  and  $h_{km}^{true} \in \mathbf{H}^{[true]}$ .

495 Here, the primitive signal is represented as  $\mathbf{W}^{[true]}$  and the weight of each muscle, that is,

496 the module, is denoted by  $\mathbf{H}^{[true]}$ .

497 The residual sum of squares (RSS) of the true motor module was evaluated to assess

498 the performance of each method. In other words, for the RSS of  $k$  –th synergy, we evaluated

499 the

$$RSS_k^{[W]} = \sum_{t=1}^T \left( w_{tk}^{[true]} - w_{tk}^{[estimated]} \right)^2 \#(18)$$

$$RSS_k^{[H]} = \sum_{m=1}^M \left( h_{km}^{[true]} - h_{km}^{[estimated]} \right)^2 \#(19)$$

500 where  $w_{tk}^{[estimated]}$  and  $h_{km}^{[estimated]}$  are estimated values for  $\mathbf{W}^{[true]}$  and  $\mathbf{H}^{[true]}$ ,

501 respectively.

502 Note that we normalized the values  $w_{tk}^{[estimated]}$  and  $h_{km}^{[estimated]}$  for each method because

503 the scale of the estimated values differs from method to method. Normalization was

504 performed for each estimated motor module by each method; each element was divided by



505 the value of maximum value in the estimated primitive signal  $\mathbf{W}'^{[estimated]}$  and synergy  
506  $\mathbf{H}'^{[estimated]}$ , and multiplied by 100. This was also true for  $\mathbf{W}'^{[true]}$  and  $\mathbf{H}'^{[true]}$ . After  
507 normalization, these estimates were used to calculate the RSS using equations (18) and (19).

508

509

510

511

512

513

514

515

516

517

518

519

520

521

522

523

524 **References**

- 525 1. Ting, L.H., Chiel, H.J., Trumbower, R.D., Allen, J.L., McKay, J.L., Hackney, M.E.,  
526 and Kesar, T.M. (2015). Neuromechanical principles underlying movement modularity and  
527 their implications for rehabilitation. *Neuron* 86, 38–54.
- 528 2. Bizzi, E., and Cheung, V.C.K. (2013). The neural origin of muscle synergies. *Front.*  
529 *Comput. Neurosci.* 7, 51.
- 530 3. Bizzi, E., Cheung, V.C.K., d’Avella, A., Saltiel, P., and Tresch, M. (2008).  
531 Combining modules for movement. *Brain Res. Rev.* 57, 125–133.
- 532 4. d’Avella, A., Saltiel, P., and Bizzi, E. (2003). Combinations of muscle synergies in  
533 the construction of a natural motor behavior. *Nat. Neurosci.* 6, 300–308.
- 534 5. Ting, L.H., and McKay, J.L. (2007). Neuromechanics of muscle synergies for  
535 posture and movement. *Curr. Opin. Neurobiol.* 17, 622–628.
- 536 6. Tresch, M.C., and Jarc, A. (2009). The case for and against muscle synergies. *Curr.*  
537 *Opin. Neurobiol.* 19, 601–607.
- 538 7. Safavynia, S.A., Torres-Oviedo, G., and Ting, L.H. (2011). Muscle Synergies:  
539 Implications for Clinical Evaluation and Rehabilitation of Movement. *Top. Spinal Cord Inj.*  
540 *Rehabil.* 17, 16–24.

- 541 8. Tresch, M.C., Saltiel, P., and Bizzi, E. (1999). The construction of movement by the  
542 spinal cord. *Nat. Neurosci.* 2, 162–167.
- 543 9. Godlove, J., Gulati, T., Dichter, B., Chang, E., and Ganguly, K. (2016). Muscle  
544 synergies after stroke are correlated with perilesional high gamma. *Ann Clin Transl Neurol* 3,  
545 956–961.
- 546 10. Ting, L.H., and Macpherson, J.M. (2005). A limited set of muscle synergies for force  
547 control during a postural task. *J. Neurophysiol.* 93, 609–613.
- 548 11. Shourijeh, M.S., Flaxman, T.E., and Benoit, D.L. (2016). An approach for improving  
549 repeatability and reliability of non-negative matrix factorization for muscle synergy analysis.  
550 *J. Electromyogr. Kinesiol.* 26, 36–43.
- 551 12. Cheung, V.C.K., and Seki, K. (2021). Approaches to revealing the neural basis of  
552 muscle synergies: a review and a critique. *J. Neurophysiol.* 125, 1580–1597.
- 553 13. Rabbi, M.F., Pizzolato, C., Lloyd, D.G., Carty, C.P., Devaprakash, D., and Diamond,  
554 L.E. (2020). Non-negative matrix factorisation is the most appropriate method for extraction  
555 of muscle synergies in walking and running. *Sci. Rep.* 10, 8266.
- 556 14. Turpin, N.A., Uriac, S., and Dalleau, G. (2021). How to improve the muscle synergy  
557 analysis methodology? *Eur. J. Appl. Physiol.* 121, 1009–1025.

- 558 15. Chiovetto, E., Salatiello, A., d'Avella, A., and Giese, M.A. (2022). Toward a  
559 unifying framework for the modeling and identification of motor primitives. *Front. Comput.*  
560 *Neurosci.* *16*, 926345.
- 561 16. Amundsen Huffmaster, S.L., Van Acker, G.M., 3rd, Luchies, C.W., and Cheney, P.D.  
562 (2018). Muscle Synergies Obtained from Comprehensive Mapping of the Cortical Forelimb  
563 Representation Using Stimulus Triggered Averaging of EMG Activity. *J. Neurosci.* *38*,  
564 8759–8771.
- 565 17. Tan, C.K., Kadone, H., Miura, K., Abe, T., Koda, M., Yamazaki, M., Sankai, Y., and  
566 Suzuki, K. (2019). Muscle Synergies During Repetitive Stoop Lifting With a  
567 Bioelectrically-Controlled Lumbar Support Exoskeleton. *Front. Hum. Neurosci.* *13*, 142.
- 568 18. Valk, T.A., Mouton, L.J., Otten, E., and Bongers, R.M. (2019). Fixed muscle  
569 synergies and their potential to improve the intuitive control of myoelectric assistive  
570 technology for upper extremities. *J. Neuroeng. Rehabil.* *16*, 6.
- 571 19. Ma, Y., Shi, C., Xu, J., Ye, S., Zhou, H., and Zuo, G. (2021). A Novel Muscle  
572 Synergy Extraction Method Used for Motor Function Evaluation of Stroke Patients: A Pilot  
573 Study. *Sensors* *21*. 10.3390/s21113833.

- 574 20. Cheung, V.C.K., Cheung, B.M.F., Zhang, J.H., Chan, Z.Y.S., Ha, S.C.W., Chen,  
575 C.-Y., and Cheung, R.T.H. (2020). Plasticity of muscle synergies through fractionation and  
576 merging during development and training of human runners. *Nat. Commun.* *11*, 4356.
- 577 21. Mehryar, P., Shourijeh, M.S., Rezaeian, T., Iqbal, N., Messenger, N., and  
578 Dehghani-Sanij, A.A. (2017). Changes in synergy of transtibial amputee during gait: A pilot  
579 study. In *2017 IEEE EMBS International Conference on Biomedical & Health Informatics*  
580 (BHI), pp. 325–328.
- 581 22. Mehryar, P., Shourijeh, M.S., Rezaeian, T., Khandan, A.R., Messenger, N., O'Connor,  
582 R., Farahmand, F., and Dehghani-Sanij, A. (2020). Differences in muscle synergies between  
583 healthy subjects and transfemoral amputees during normal transient-state walking speed. *Gait*  
584 *Posture* *76*, 98–103.
- 585 23. Ferraty, F., and Vieu, P. (2006). *Nonparametric Functional Data Analysis* (Springer  
586 New York).
- 587 24. Ramsay, J.O., and Silverman, B.W. (2005). *Functional Data Analysis* (Springer New  
588 York).
- 589 25. Backenroth, D., Shinohara, R.T., Schrack, J.A., and Goldsmith, J. (2020).  
590 Nonnegative decomposition of functional count data. *Biometrics* *76*, 1273–1284.

- 591 26. Berry, M.W., Browne, M., Langville, A.N., Pauca, V.P., and Plemmons, R.J. (2007).  
592 Algorithms and applications for approximate nonnegative matrix factorization. *Comput. Stat.*  
593 *Data Anal.* 52, 155–173.
- 594 27. Santello, M., and Soechting, J.F. (2000). Force synergies for multifingered grasping.  
595 *Exp. Brain Res.* 133, 457–467.
- 596 28. Guan, N., Tao, D., Luo, Z., and Yuan, B. (2012). NeNMF: An Optimal Gradient  
597 Method for Nonnegative Matrix Factorization. *IEEE Trans. Signal Process.* 60, 2882–2898.
- 598 29. Kaminski, T.R. (2007). The coupling between upper and lower extremity synergies  
599 during whole body reaching. *Gait Posture* 26, 256–262.
- 600 30. Chiovetto, E., Patanè, L., and Pozzo, T. (2012). Variant and invariant features  
601 characterizing natural and reverse whole-body pointing movements. *Exp. Brain Res.* 218,  
602 419–431.
- 603 31. Smith, C., Gilleard, W., Hammond, J., and Brooks, L. (2006). The Application of an  
604 Exploratory Factor Analysis to Investigate the Inter-Relationships amongst Joint Movement  
605 During Performance of a Football Skill. *J. Sports Sci. Med.* 5, 417–524.
- 606 32. Steinberg, F., and Bock, O. (2013). Influence of cognitive functions and behavioral  
607 context on grasping kinematics. *Exp. Brain Res.* 225, 387–397.

- 608 33. Jolliffe, I.T., and Cadima, J. (2016). Principal component analysis: a review and  
609 recent developments. *Philos. Trans. A Math. Phys. Eng. Sci.* 374, 20150202.
- 610 34. Yuan, K.-H., and Zhong, X. (2008). 8. Outliers, Leverage Observations, and  
611 Influential Cases in Factor Analysis: Using Robust Procedures to Minimize Their Effect.  
612 *Sociol. Methodol.* 38, 329–368.
- 613 35. Berrendero, J.R., Justel, A., and Svarc, M. (2011). Principal components for  
614 multivariate functional data. *Comput. Stat. Data Anal.* 55, 2619–2634.
- 615 36. Jacques, J., and Preda, C. (2014). Functional data clustering: a survey. *Adv. Data*  
616 *Anal. Classif.* 8, 231–255.
- 617 37. Zhang, M., and Parnell, A. (2022). Review of Clustering Methods for Functional  
618 Data. *arXiv [stat.ME]*.
- 619 38. Goudriaan, M., Papageorgiou, E., Shuman, B.R., Steele, K.M., Dominici, N., Van  
620 Campenhout, A., Ortibus, E., Molenaers, G., and Desloovere, K. (2021). Muscle synergy  
621 structure and gait patterns in children with spastic cerebral palsy. *Dev. Med. Child Neurol.* 64,  
622 462–468.
- 623 39. Kubota, K., Hanawa, H., Yokoyama, M., Kita, S., Hirata, K., Fujino, T., Kokubun, T.,  
624 Ishibashi, T., and Kanemura, N. (2021). Usefulness of Muscle Synergy Analysis in

- 625 Individuals With Knee Osteoarthritis During Gait. *IEEE Trans. Neural Syst. Rehabil. Eng.* 29,  
626 239–248.
- 627 40. Hashiguchi, Y., Goto, R., and Naka, T. (2023). Effects of orthoses on muscle activity  
628 and synergy during gait. *PLoS One* 18, e0281541.
- 629 41. Cabaraux, P., Agrawal, S.K., Cai, H., Calabro, R.S., Casali, C., Damm, L., Doss, S.,  
630 Habas, C., Horn, A.K.E., Ilg, W., et al. (2022). Consensus Paper: Ataxic Gait. *Cerebellum*.  
631 10.1007/s12311-022-01373-9.
- 632 42. Tan, C.K., Kadone, H., Watanabe, H., Marushima, A., Hada, Y., Yamazaki, M.,  
633 Sankai, Y., Matsumura, A., and Suzuki, K. (2020). Differences in Muscle Synergy Symmetry  
634 Between Subacute Post-stroke Patients With Bioelectrically-Controlled Exoskeleton Gait  
635 Training and Conventional Gait Training. *Front Bioeng Biotechnol* 8, 770.
- 636 43. Alnajjar, F., Zaier, R., Khalid, S., and Gochoo, M. (2020). Trends and Technologies  
637 in Rehabilitation of Foot Drop: A Systematic Review. *Expert Rev. Med. Devices* 18, 31–46.
- 638 44. Lim, J., Lim, T., Lee, J., Sim, J., Chang, H., Yoon, B., and Jung, H. (2021).  
639 Patient-specific functional electrical stimulation strategy based on muscle synergy and  
640 walking posture analysis for gait rehabilitation of stroke patients. *J. Int. Med. Res.* 49,  
641 3000605211016782.



- 642 45. Michaud, F., Shourijeh, M.S., Fregly, B.J., and Cuadrado, J. (2020). Do Muscle  
643 Synergies Improve Optimization Prediction of Muscle Activations During Gait? *Front.*  
644 *Comput. Neurosci.* *14*, 54.
- 645 46. Mehrabi, N., Schwartz, M.H., and Steele, K.M. (2019). Can altered muscle synergies  
646 control unimpaired gait? *J. Biomech.* *90*, 84–91.
- 647 47. Zhu, F., Kern, M., Fowkes, E., Afzal, T., Contreras-Vidal, J.-L., Francisco, G.E., and  
648 Chang, S.-H. (2021). Effects of an exoskeleton-assisted gait training on post-stroke  
649 lower-limb muscle coordination. *J. Neural Eng.* *18*. [10.1088/1741-2552/abf0d5](https://doi.org/10.1088/1741-2552/abf0d5).
- 650 48. Afzal, T., Zhu, F., Tseng, S.-C., Lincoln, J.A., Francisco, G.E., Su, H., and Chang,  
651 S.-H. (2022). Evaluation of Muscle Synergy During Exoskeleton-Assisted Walking in  
652 Persons With Multiple Sclerosis. *IEEE Trans. Biomed. Eng.* *69*, 3265–3274.
- 653 49. Zwaan, E., Becher, J.G., and Harlaar, J. (2011). Synergy of EMG patterns in gait as  
654 an objective measure of muscle selectivity in children with spastic cerebral palsy. *Gait*  
655 *Posture* *35*, 111–115.
- 656 50. VAN CRIEKINGE, T., SAEYS, W., HALLEMANS, A., HERSSSENS, N., LAFOSSE, C., VAN LAERE,  
657 K., DEREYMAEKER, L., VAN TICHELT, E., DE HERTOGH, W., and TRUIJEN, S. (2020). SWEAT2  
658 study: effectiveness of trunk training on muscle activity after stroke. A randomized controlled  
659 trial. *Eur. J. Phys. Rehabil. Med.* *57*, 485–494.

- 660 51. Acuña, S.A., Tyler, M.E., and Thelen, D.G. (2022). Individuals with Chronic  
661 Mild-to-Moderate Traumatic Brain Injury Exhibit Decreased Neuromuscular Complexity  
662 During Gait. *Neurorehabil. Neural Repair* 36, 317–327.
- 663 52. Hubert, M., Rousseeuw, P., and Verdonck, T. (2009). Robust PCA for skewed data  
664 and its outlier map. *Comput. Stat. Data Anal.* 53, 2264–2274.
- 665 53. Engelen, S., Hubert, M., and Vanden Branden, K. (2005). A Comparison of Three  
666 Procedures for Robust PCA in High Dimensions. *AJS* 34, 117–126.
- 667 54. Hubert, M., Rousseeuw, P.J., and Vanden Branden, K. (2005). ROBPCA: A New  
668 Approach to Robust Principal Component Analysis. *Technometrics* 47, 64–79.
- 669 55. Reynkens, T. (2018). Robust Sparse PCA using the ROSPCA Algorithm [R package  
670 rospca version 1.0.4].

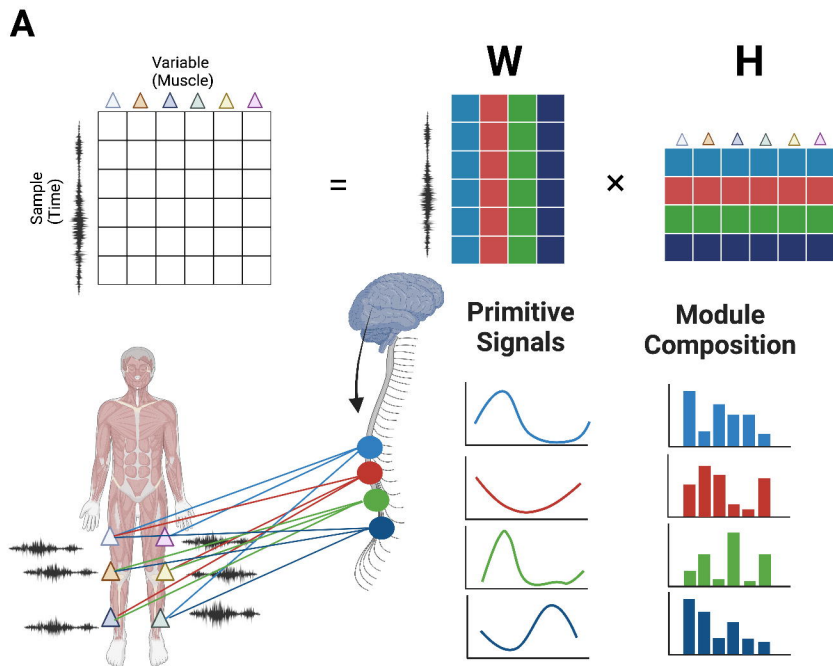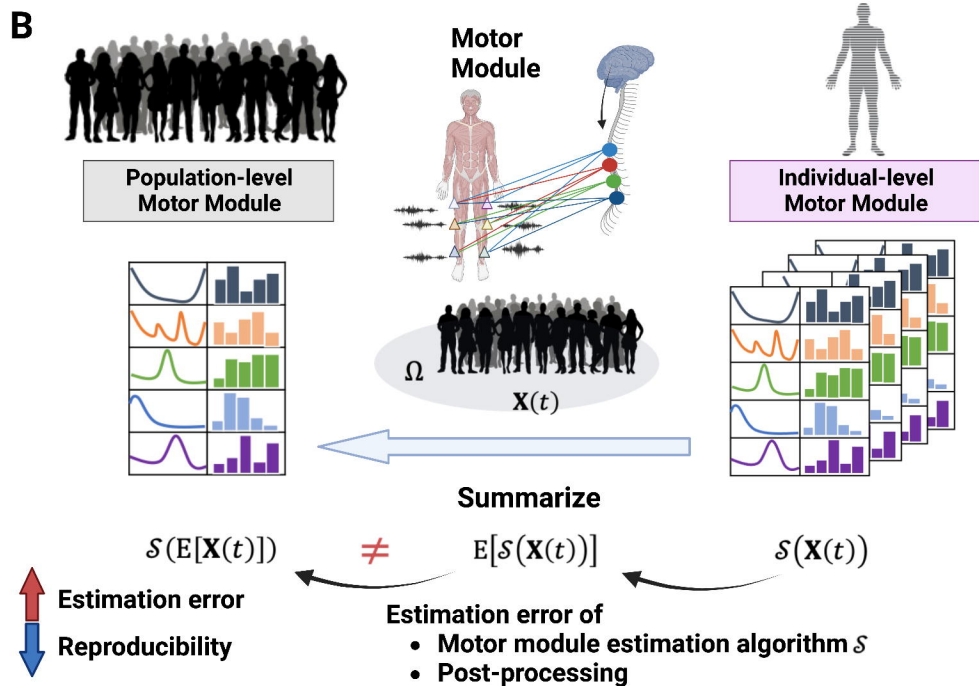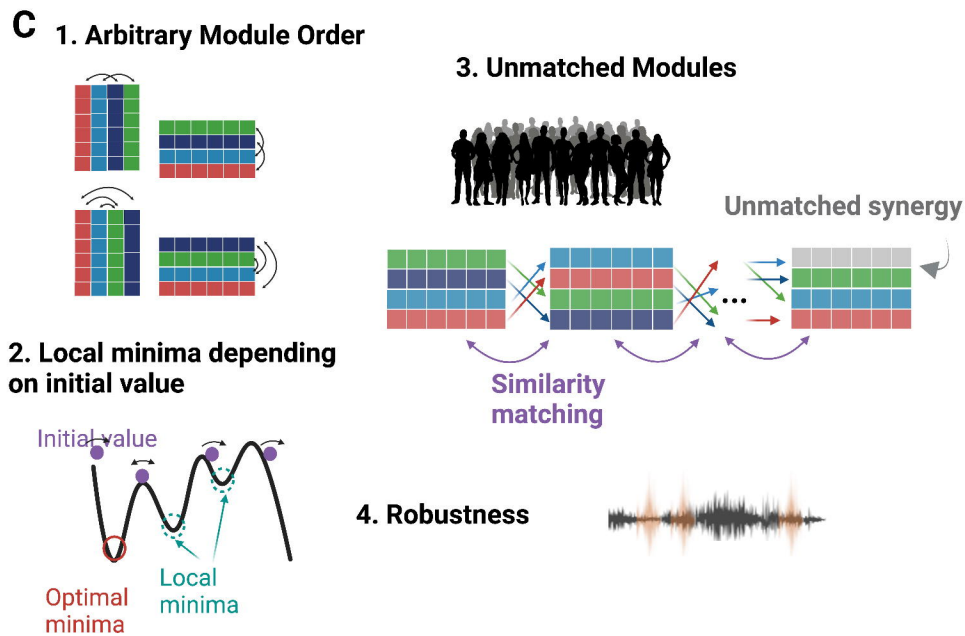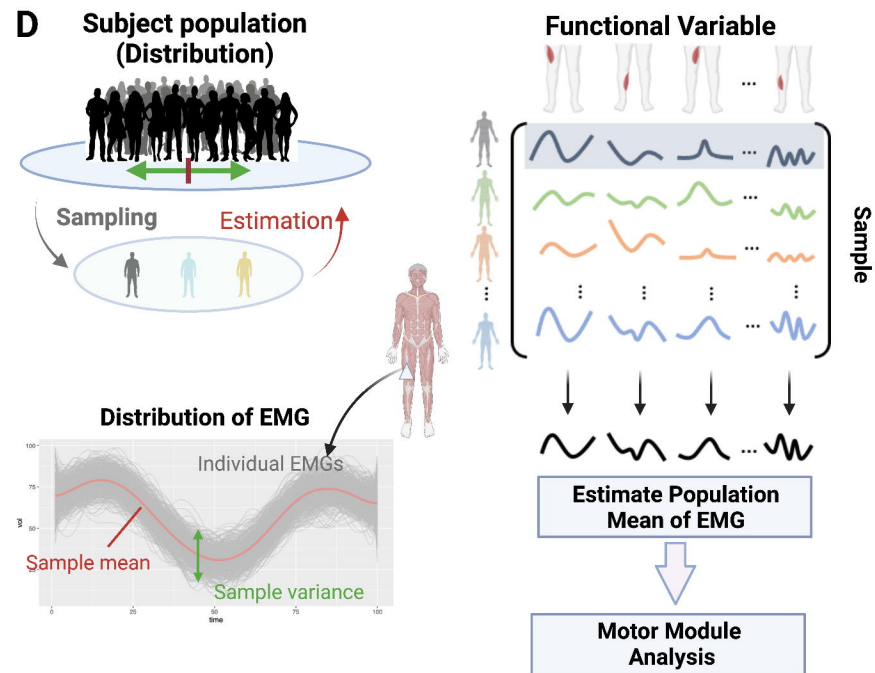

# A Module Matching Approach

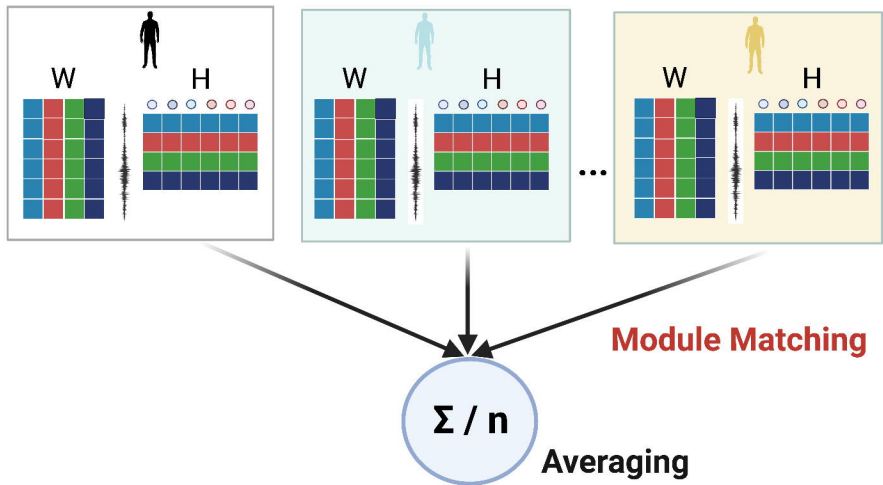

# B Concatenated NMF-based Approach

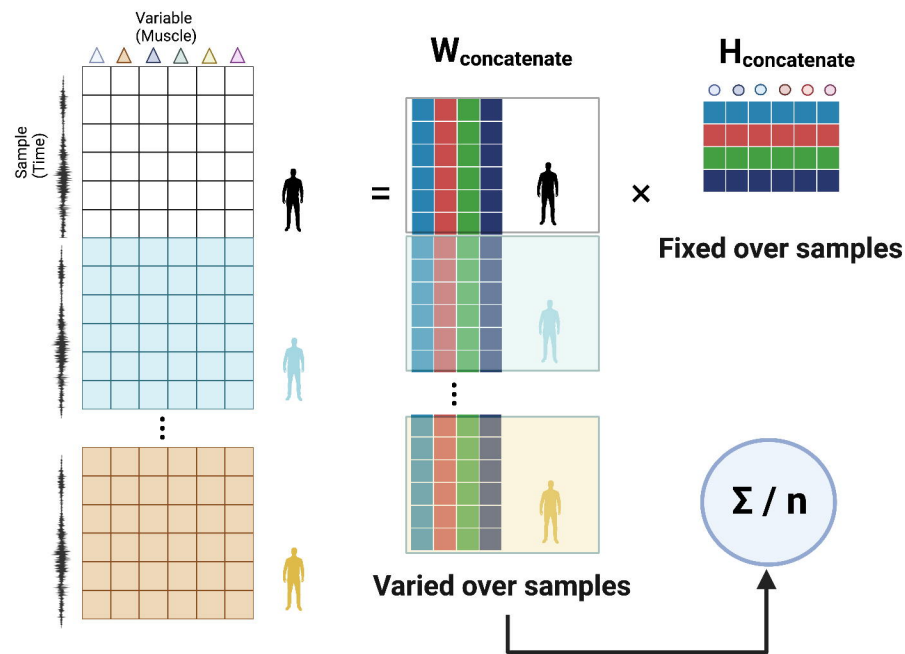

# C Population-level Motor Module (Proposed method)

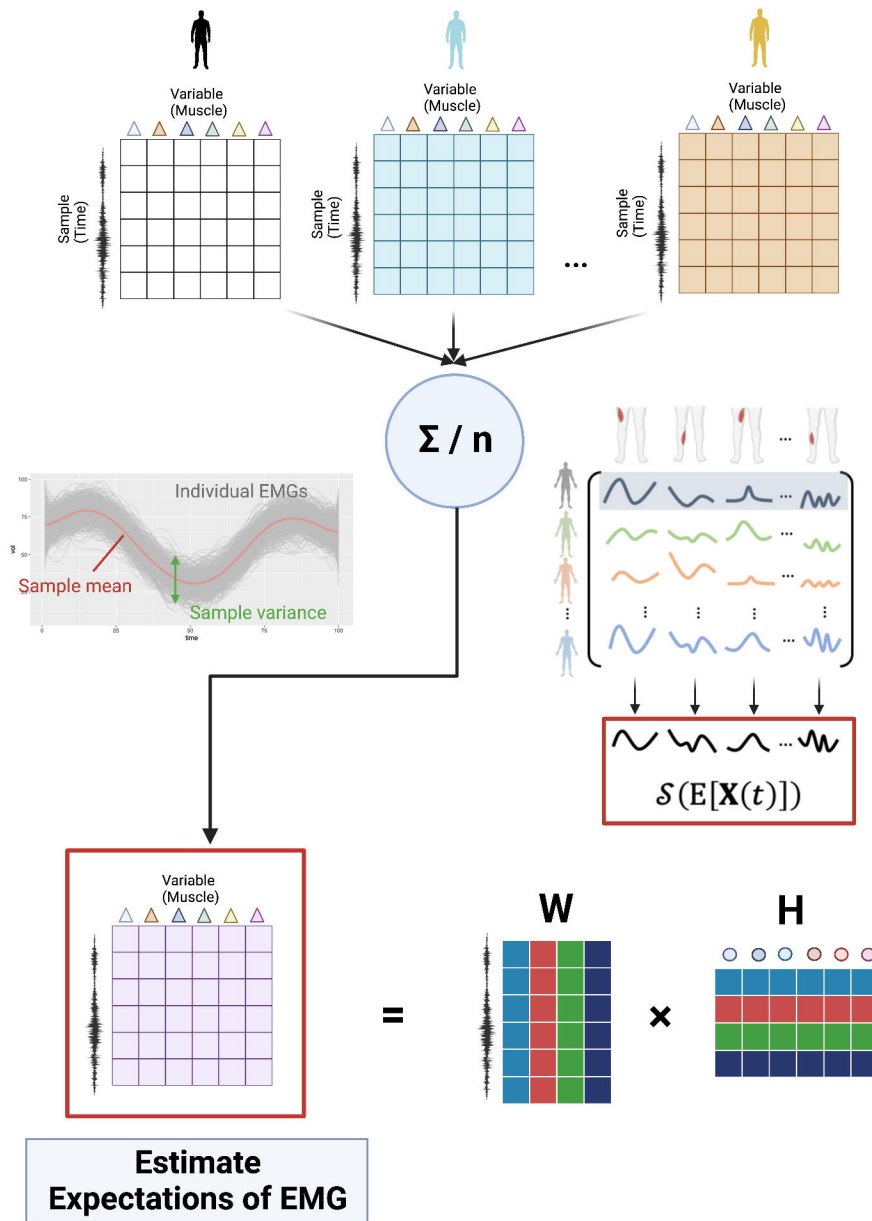

**A**

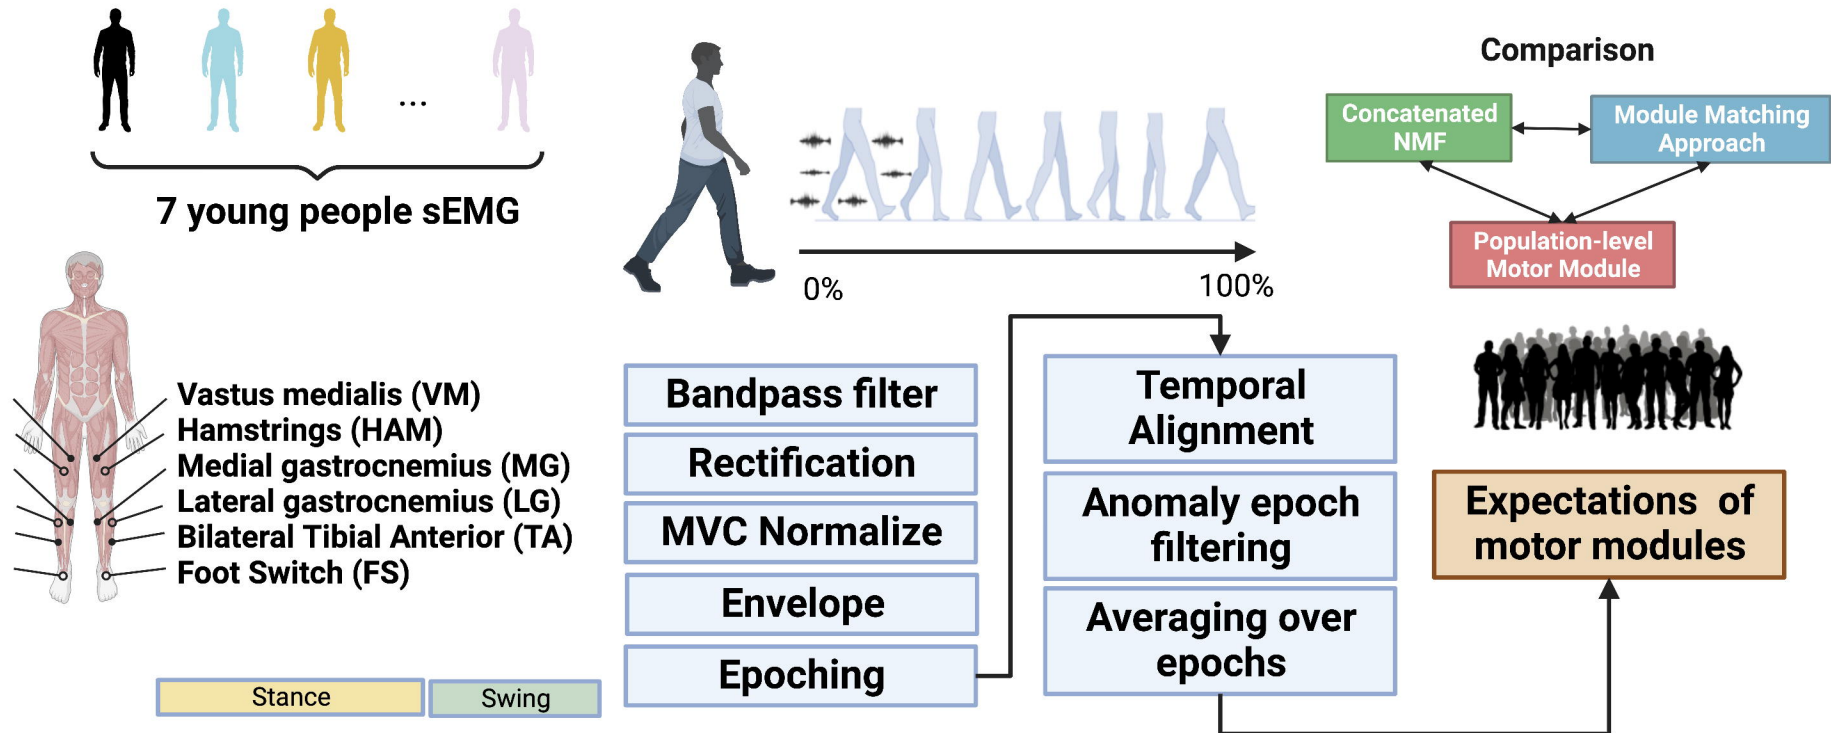

**B**

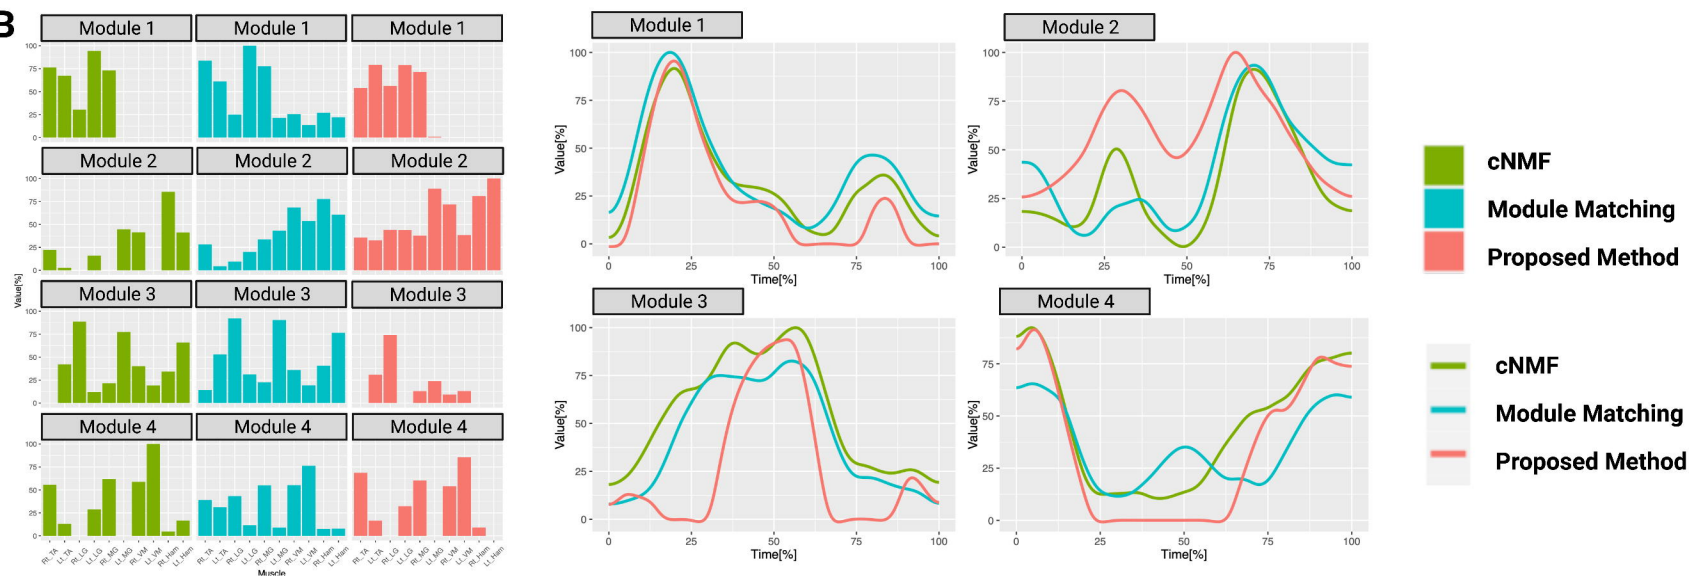

A

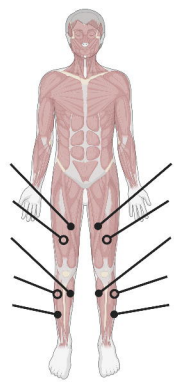

**Vastus medialis (VM)**  
**Hamstrings (HAM)**  
**Medial gastrocnemius (MG)**  
**Lateral gastrocnemius (LG)**  
**Bilateral Tibial Anterior (TA)**

**True Mean of Muscle Activity**

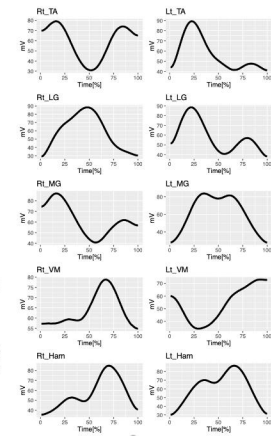

$$\mu_m(t) = \sum_{q=1}^Q \bar{c}_{m,q} b_{m,q}(t)$$

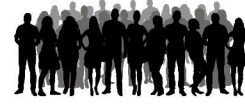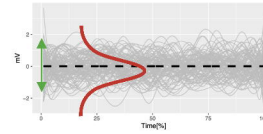

$$c_{i,m,q} = \bar{c}_{m,q} + \epsilon$$

$$\epsilon \sim N(0, \sigma)$$

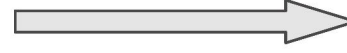

**Functional Gaussian noise**

**Random Muscle Activity**

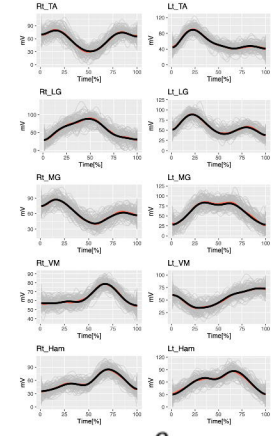

$$x_{i,m}(t) = \sum_{q=1}^Q c_{i,m,q} b_{m,q}(t)$$

## Muscle activity

medRxiv preprint doi: <https://doi.org/10.1101/2023.06.25.23291878>; this version posted June 29, 2023. The copyright holder for this preprint (which was not certified by peer review) is the author/funder, who has granted medRxiv a license to display the preprint in perpetuity. It is made available under a [CC-BY-NC 4.0 International license](https://creativecommons.org/licenses/by-nc/4.0/).

**n=10**

**n=50**

**n=100**

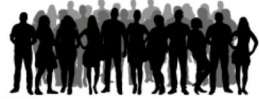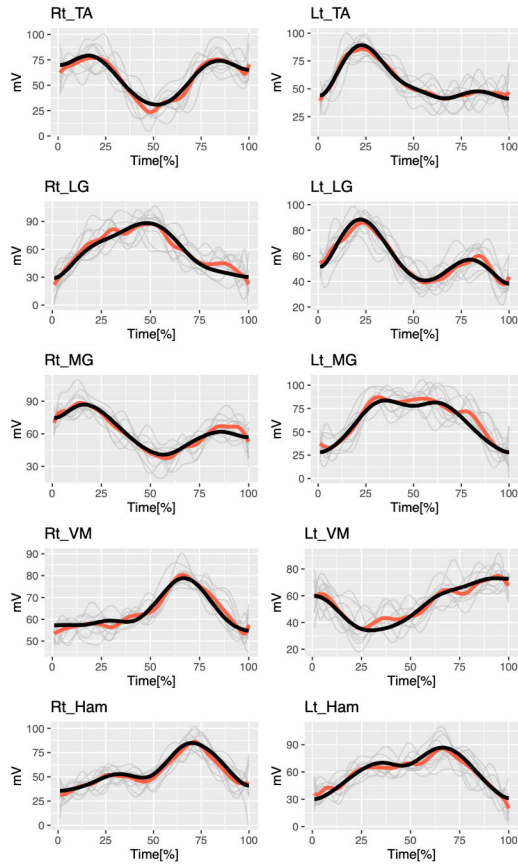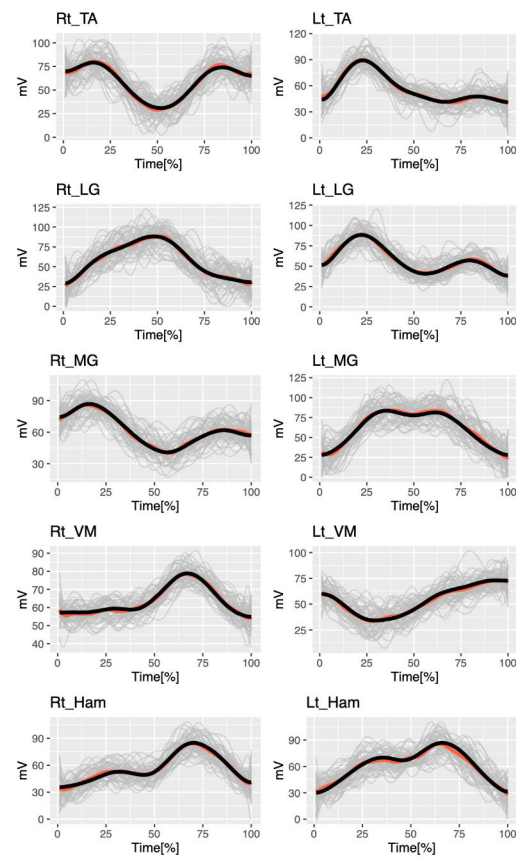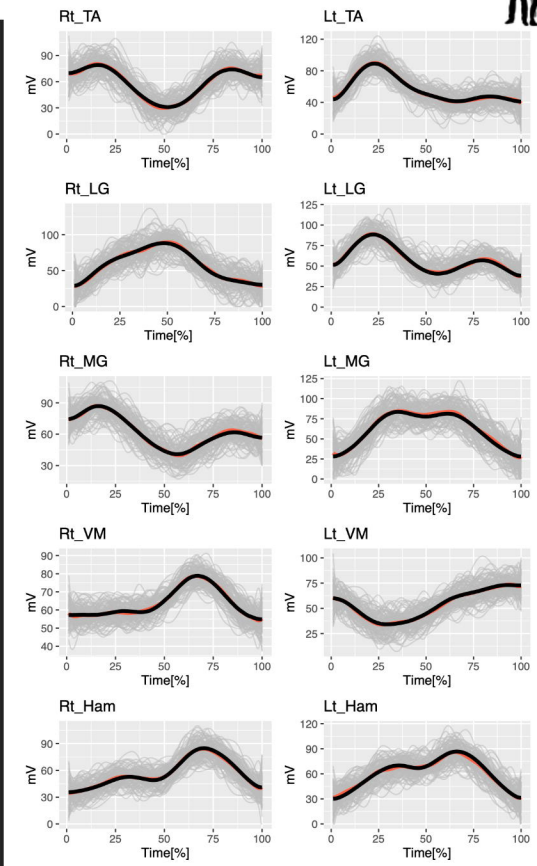

Module Matching  
Proposed Method  
True

## Module Composition

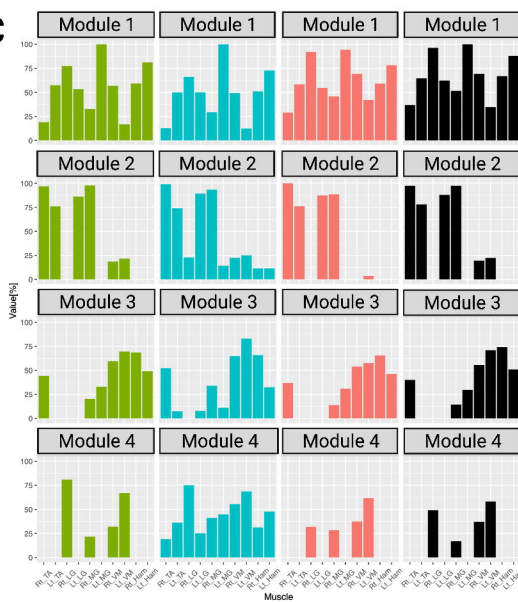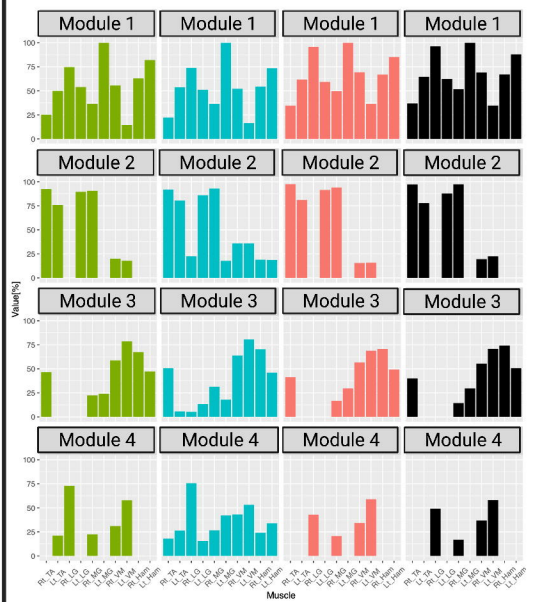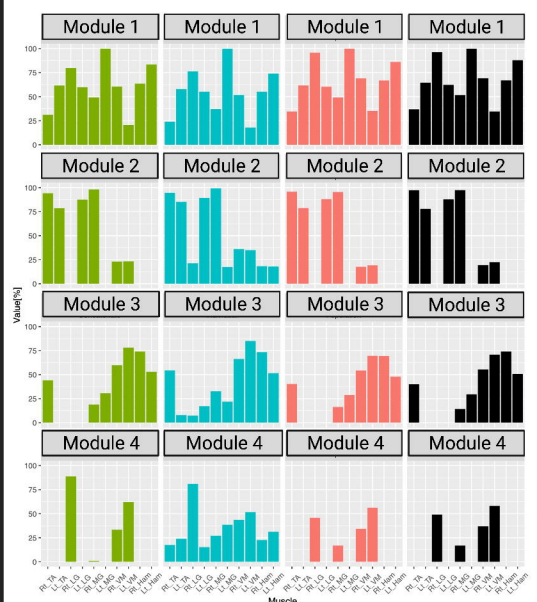

cNMF  
Module Matching  
Proposed Method  
True

## Primitive signal

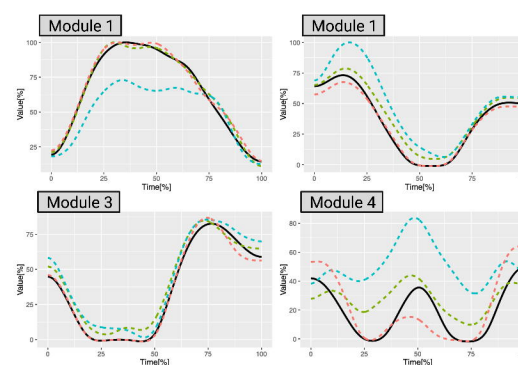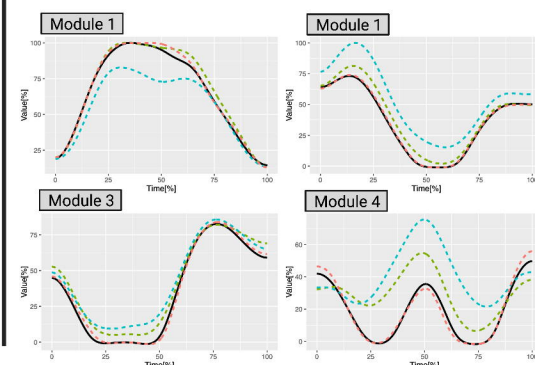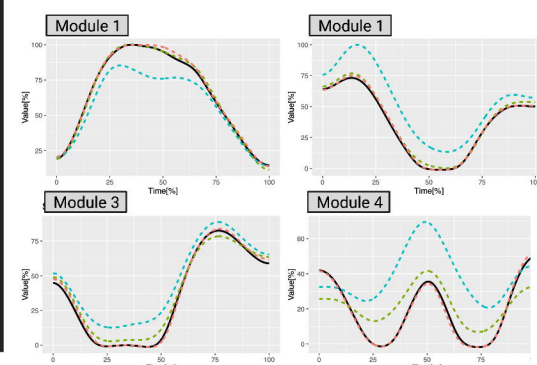

cNMF  
Module Matching  
Proposed Method  
True

A

n=10

n=50

n=100

## Residual Sum of Squares without Outliers

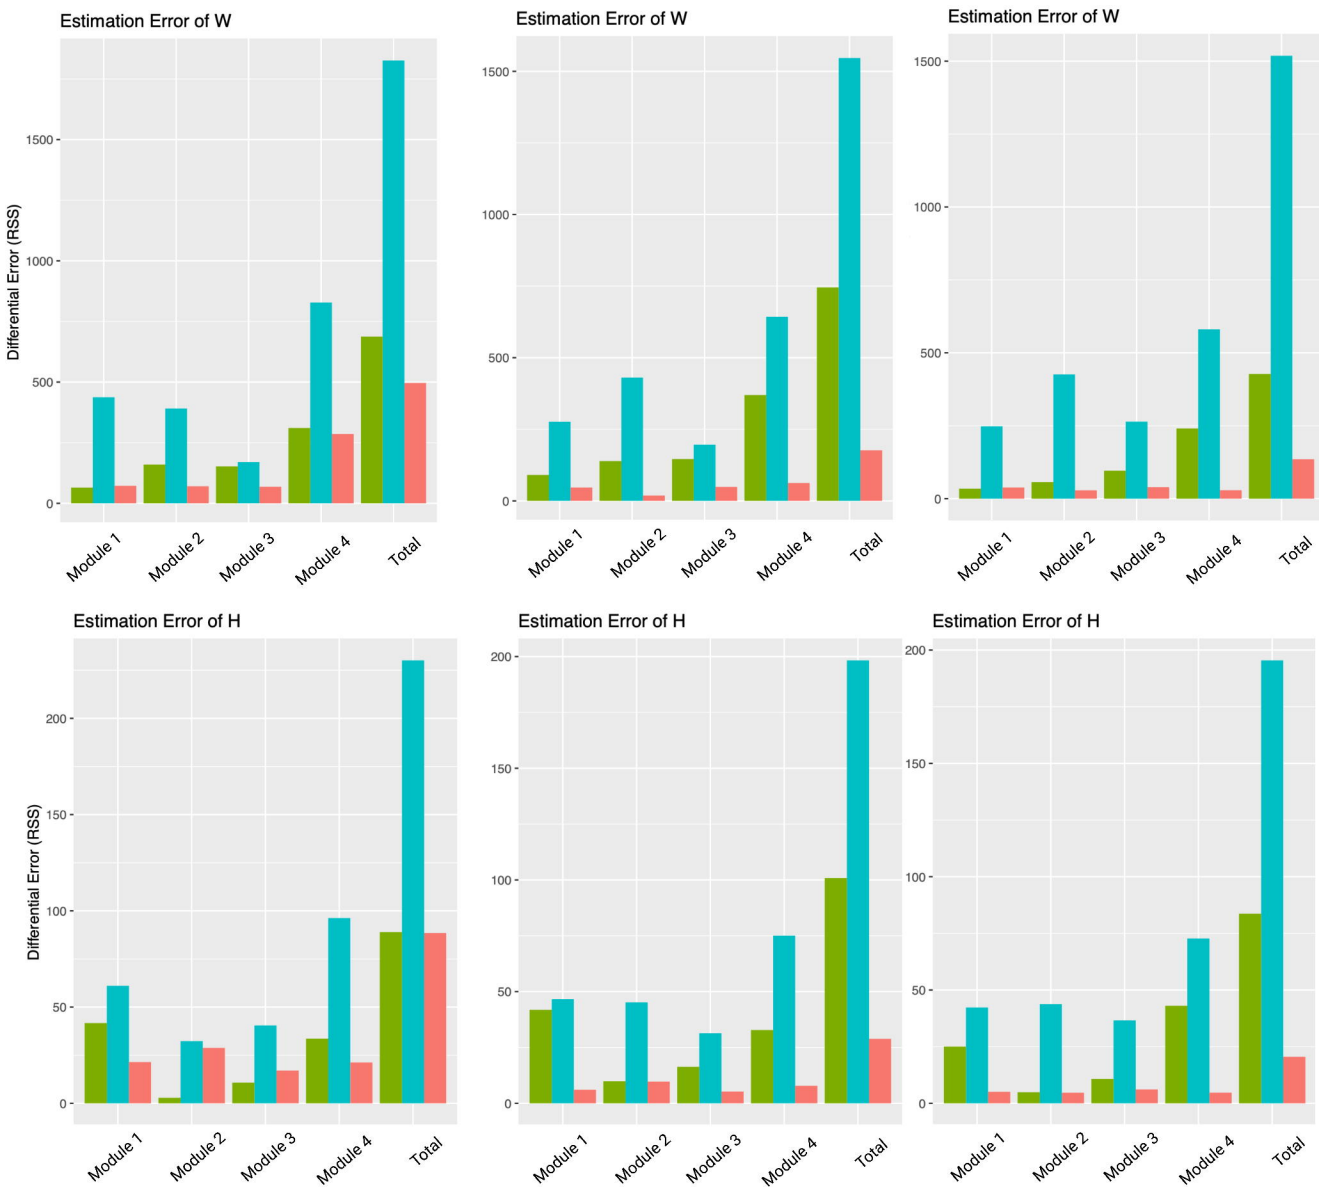

B

Sample size

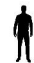

n=10

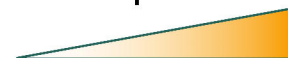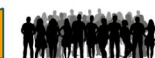

n=100

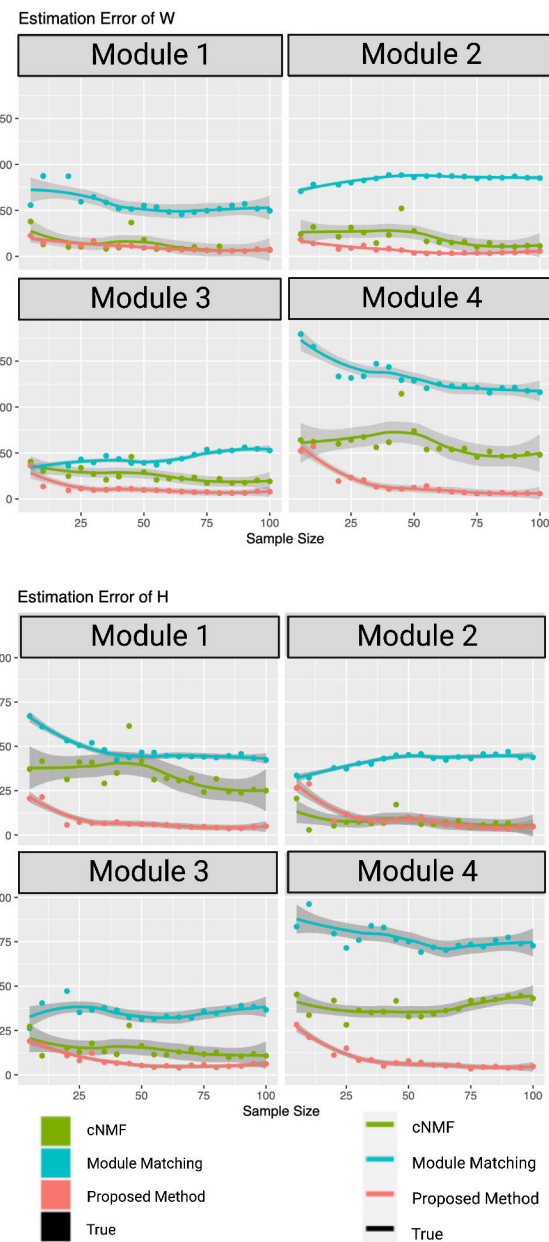

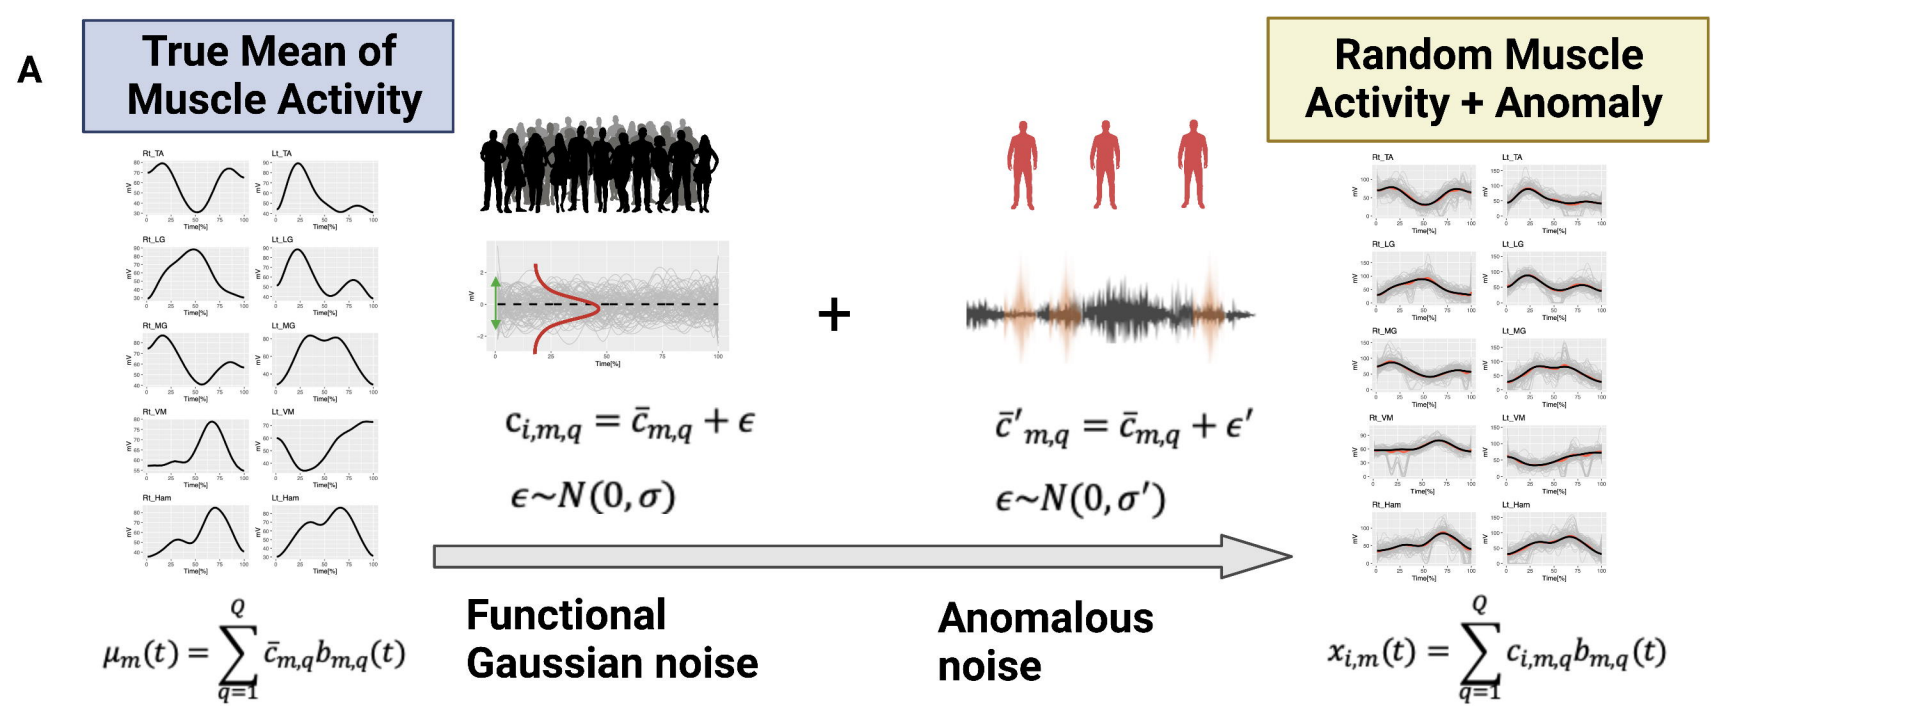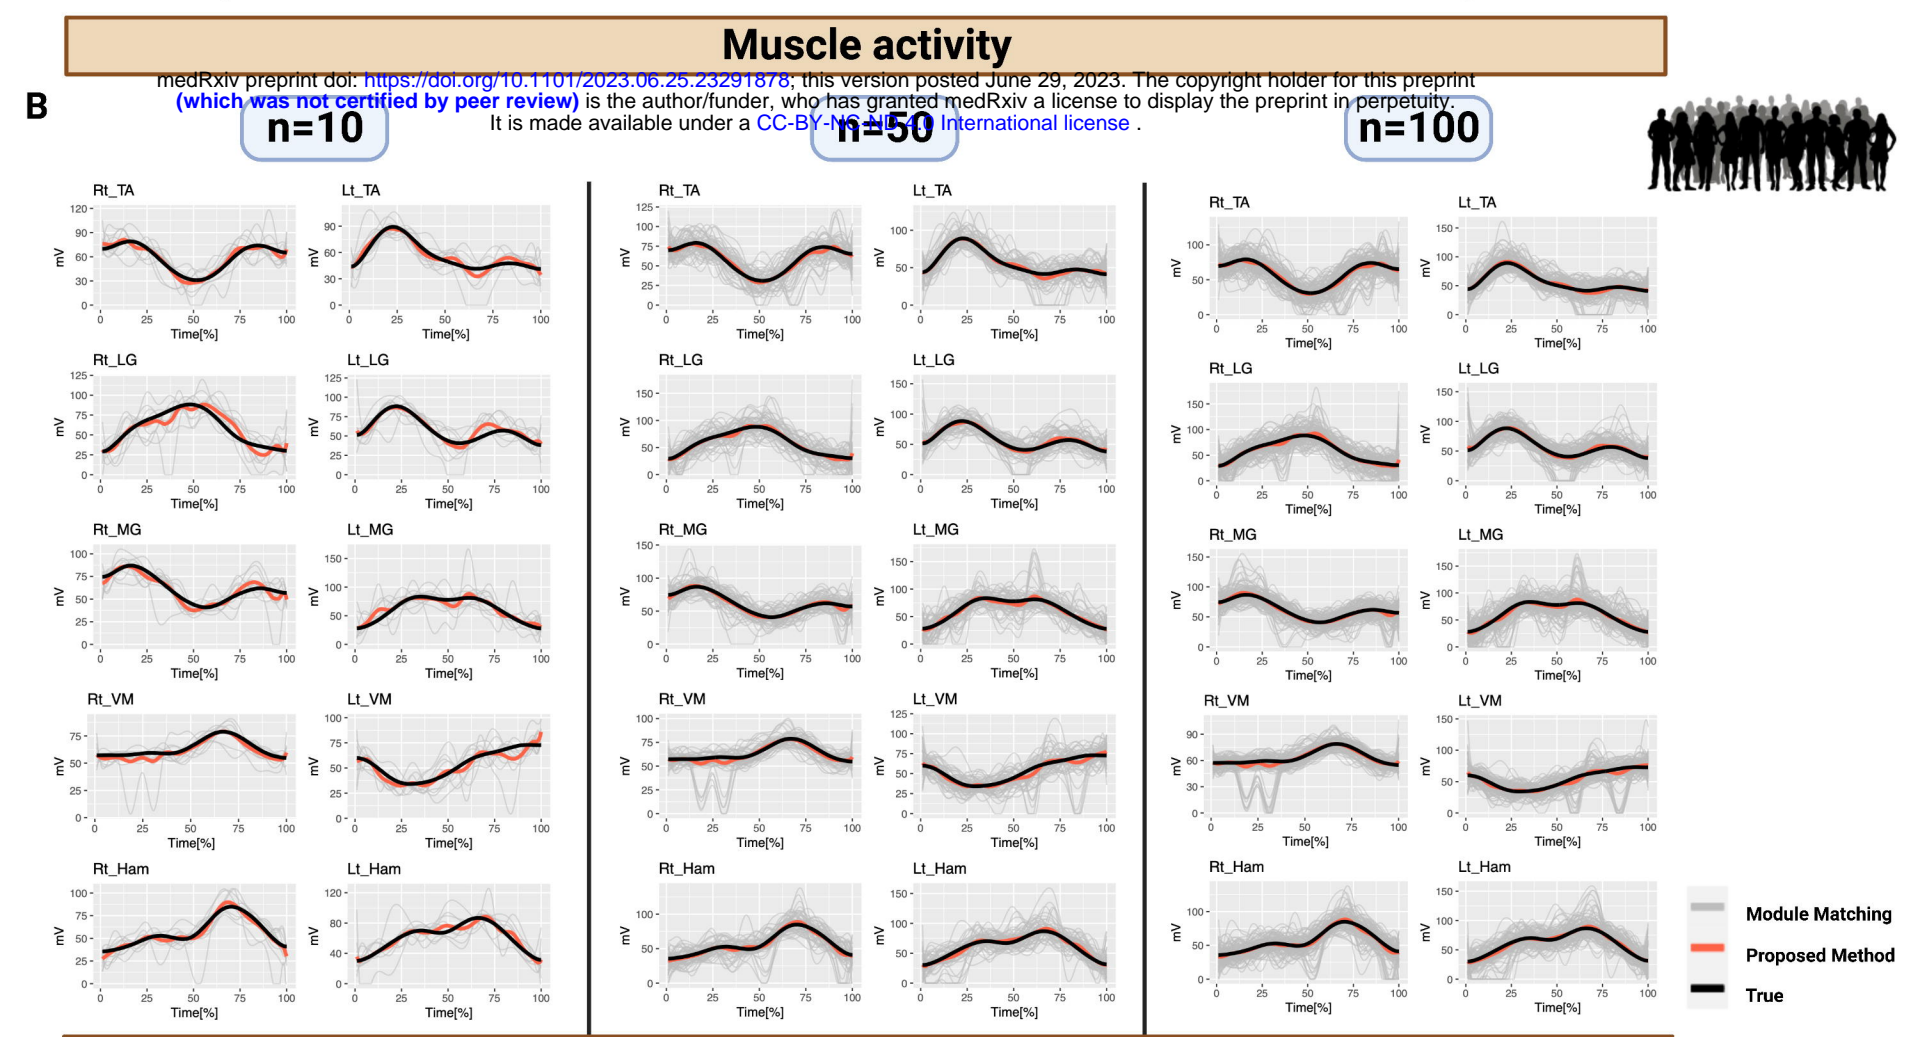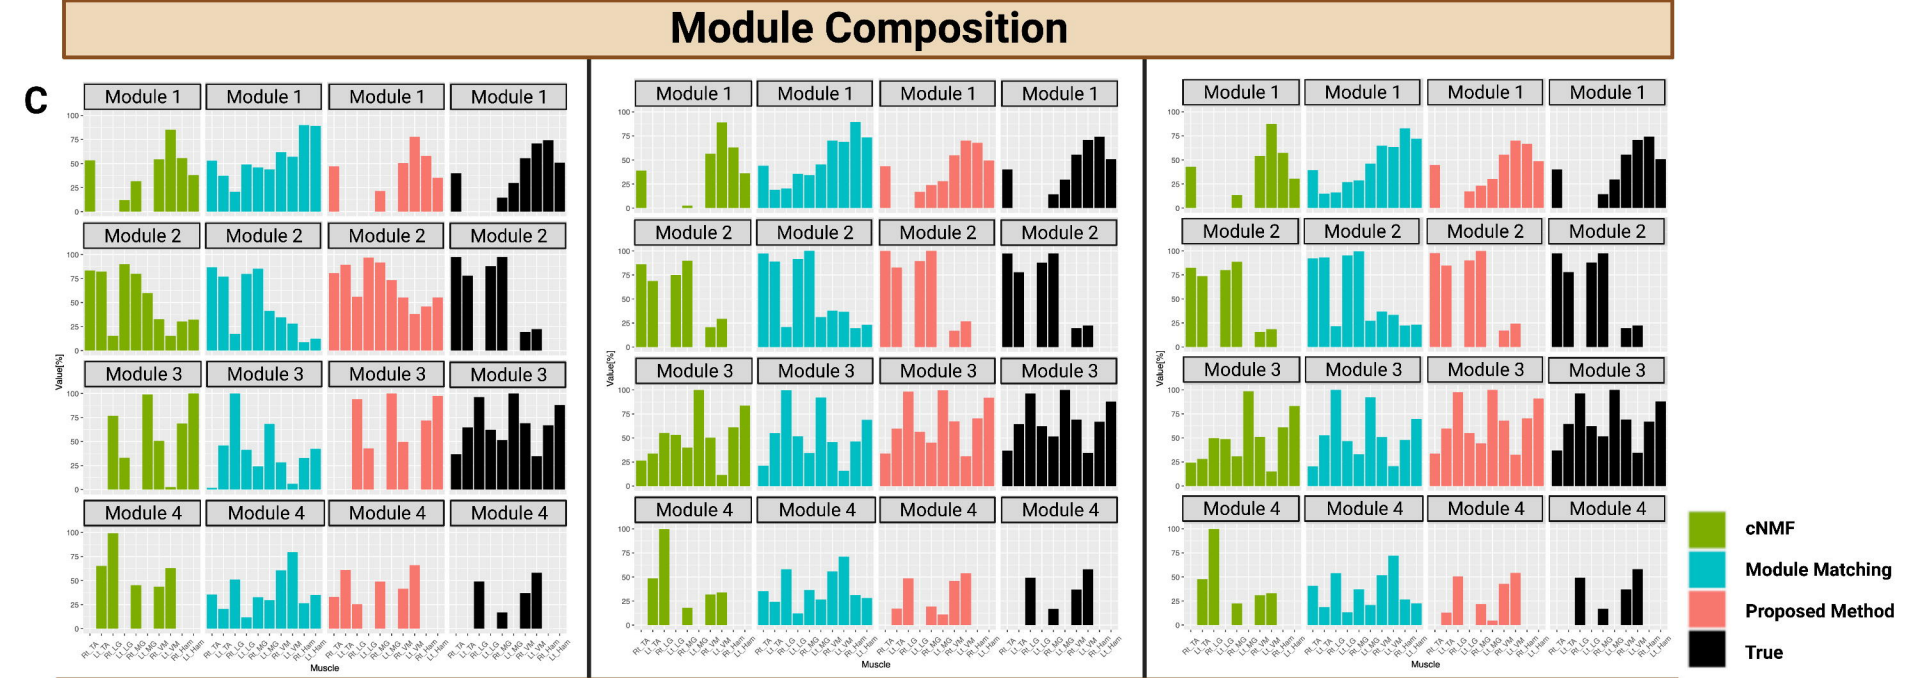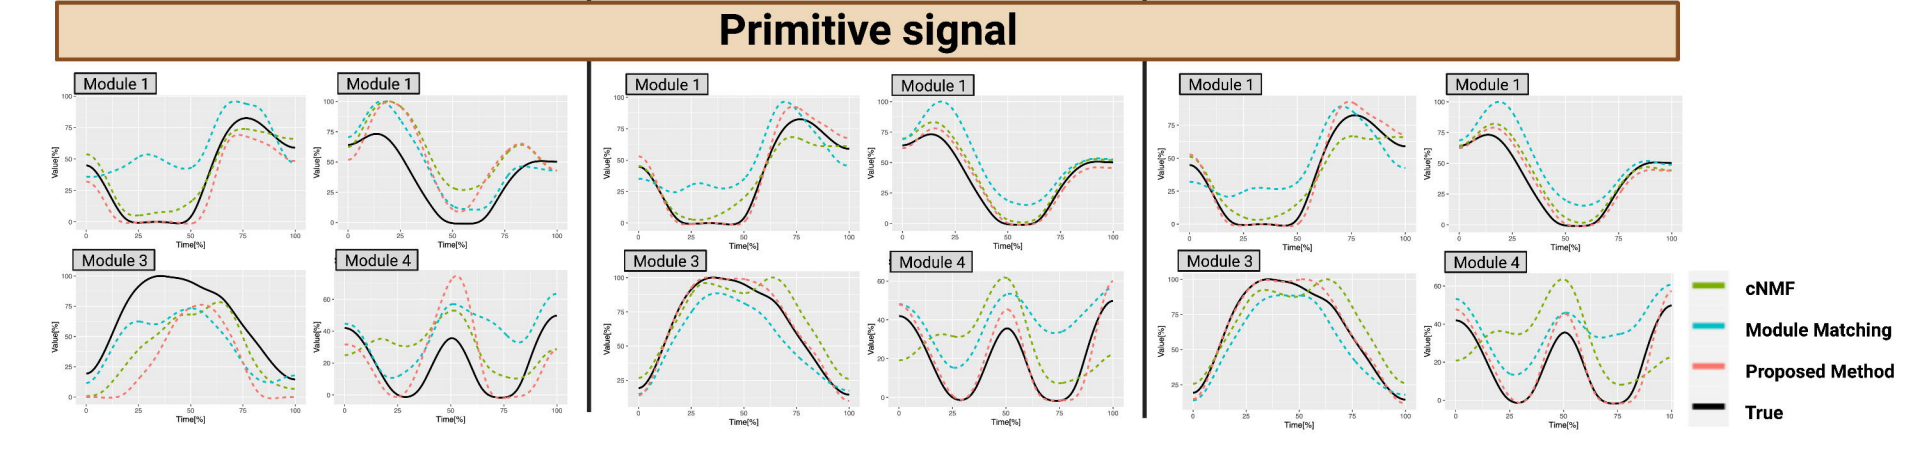

Source: https://medrxiv.org/content/10.1101/2023.06.25.23291878v1.full.pdf
